# Supplementary material for: Dental caries and preterm birth: a systematic review and meta-analysis
Source: PubMed Central journal article supplement — BMJ Open. 2018 Mar 2;8(3):e018556. doi: 10.1136/bmjopen-2017-018556 (PMC5855295; doi:10.1136/bmjopen-2017-018556), 2018-03-02
Supplement: bmjopen-2017-018556.draft_revisions.pdf [file bmjopen-2017-018556.draft_revisions.pdf]

# BMJ Open

BMJ Open is committed to open peer review. As part of this commitment we make the peer review history of every article we publish publicly available.

When an article is published we post the peer reviewers' comments and the authors' responses online. We also post the versions of the paper that were used during peer review. These are the versions that the peer review comments apply to.

The versions of the paper that follow are the versions that were submitted during the peer review process. They are not the versions of record or the final published versions. They should not be cited or distributed as the published version of this manuscript.

BMJ Open is an open access journal and the full, final, typeset and author-corrected version of record of the manuscript is available on our site with no access controls, subscription charges or pay-per-view fees (<http://bmjopen.bmj.com>).

If you have any questions on BMJ Open's open peer review process please email [editorial.bmjopen@bmj.com](mailto:editorial.bmjopen@bmj.com)

# BMJ Open

## Dental caries and preterm birth: A systematic review and meta-analysis

|                                 |                                                                                                                                                                                                                                                                                                                                                                                                                                                                                                                                                                                                                                                                                                                                                                                                                                                                                                   |
|---------------------------------|---------------------------------------------------------------------------------------------------------------------------------------------------------------------------------------------------------------------------------------------------------------------------------------------------------------------------------------------------------------------------------------------------------------------------------------------------------------------------------------------------------------------------------------------------------------------------------------------------------------------------------------------------------------------------------------------------------------------------------------------------------------------------------------------------------------------------------------------------------------------------------------------------|
| Journal:                        | <i>BMJ Open</i>                                                                                                                                                                                                                                                                                                                                                                                                                                                                                                                                                                                                                                                                                                                                                                                                                                                                                   |
| Manuscript ID                   | bmjopen-2017-018556                                                                                                                                                                                                                                                                                                                                                                                                                                                                                                                                                                                                                                                                                                                                                                                                                                                                               |
| Article Type:                   | Research                                                                                                                                                                                                                                                                                                                                                                                                                                                                                                                                                                                                                                                                                                                                                                                                                                                                                          |
| Date Submitted by the Author:   | 07-Jul-2017                                                                                                                                                                                                                                                                                                                                                                                                                                                                                                                                                                                                                                                                                                                                                                                                                                                                                       |
| Complete List of Authors:       | Wagle, Madhu; Universitetet i Tromso Helsevitenskapelige fakultet Helsefak, Department of Clinical Medicine<br>D'Antonio, Francesco; Universitetet i Tromso Helsevitenskapelige fakultet Helsefak, Department of Clinical Medicine<br>Reierth, Eirik; University of Tromso, Science and Health Library<br>Basnet, Purusotam; Universitetet i Tromso Helsevitenskapelige fakultet Helsefak, Department of Clinical Medicine<br>Trovik, Tordis; Universitetet i Tromso Helsevitenskapelige fakultet Helsefak, Department of Community Medicine<br>Orsini, Giovanna; Universita Politecnica delle Marche, Department of Clinical Sciences and Stomatology<br>Manzoli, Lamberto; University of Ferrara, Department of Medical Sciences<br>Acharya, G; Karolinska Institutet, Center for Fetal Medicine; Universitetet i Tromso Helsevitenskapelige fakultet Helsefak, Department of Clinical Medicine |
| <b>Primary Subject Heading</b>: | Dentistry and oral medicine                                                                                                                                                                                                                                                                                                                                                                                                                                                                                                                                                                                                                                                                                                                                                                                                                                                                       |
| Secondary Subject Heading:      | Obstetrics and gynaecology                                                                                                                                                                                                                                                                                                                                                                                                                                                                                                                                                                                                                                                                                                                                                                                                                                                                        |
| Keywords:                       | Dental caries, pregnancy, pregnant woman, risk, preterm birth, EPIDEMIOLOGY, PUBLIC HEALTH                                                                                                                                                                                                                                                                                                                                                                                                                                                                                                                                                                                                                                                                                                                                                                                                        |
|                                 |                                                                                                                                                                                                                                                                                                                                                                                                                                                                                                                                                                                                                                                                                                                                                                                                                                                                                                   |

SCHOLARONE™  
Manuscripts

**Title page****Dental caries and preterm birth:  
A systematic review and meta-analysis**

Madhu Wagle<sup>1,\*</sup>, Francesco D'Antonio<sup>1,2</sup>, Eirik Reierth<sup>3</sup>, Purusotam Basnet<sup>1,2</sup>, Tordis A Trovik<sup>4</sup>,  
Giovanna Orsini<sup>5</sup>, Lamberto Manzoli<sup>6</sup>, Ganesh Acharya<sup>1,7,8</sup>

<sup>1</sup>Women's Health and Perinatology Research Group, Department of Clinical Medicine, Faculty of Health Sciences, UiT - The Arctic University of Norway, Tromsø, Norway.

<sup>2</sup>Department of Obstetrics and Gynaecology, University Hospital of Northern Norway, Tromsø, Norway.

<sup>3</sup>Science and Health Library, University Library, UiT The Arctic University of Norway, Tromsø, Norway.

<sup>4</sup>Department of Community Medicine, Faculty of Health Sciences, UiT – The Arctic University of Norway, Tromsø, Norway.

<sup>5</sup>Department of Clinical Sciences and Stomatology, Polytechnic University of Marche, Ancona, Italy.

<sup>6</sup>Department of Medical Sciences, University of Ferrara, Italy.

<sup>7</sup>Department of Clinical Science, Intervention and Technology, Karolinska Institute, Stockholm, Sweden.

<sup>8</sup>Center for Fetal Medicine, Karolinska University Hospital, Stockholm Sweden.

**\*Corresponding author** – Madhu Wagle

Women's Health and Perinatology Research Group, Department of Clinical Medicine,  
Faculty of Health Sciences,  
UiT The Arctic University of Norway,  
N – 9037, Tromsø, Norway.  
E-mail- [madhu.wagle@uit.no](mailto:madhu.wagle@uit.no)

Word Count: Abstract- 186 words, Texts- 2203 words ,

Tables- 3

Figures- 3

Supplementary files- 2

## ABSTRACT

**Objectives:** The primary objective of this systematic review was to explore the association between dental caries and preterm (PTB). The secondary objective was ascertaining the difference between women with dental caries who experienced PTB compared to those who did not with regards to decayed, missing, and filled teeth (DMFT) and decayed, missing, and filled surfaces (DMFS) indices.

**Methods:** Medline, Embase, Cinahl and Cochrane databases were searched up to March 2017. We included observational cohort and case-control studies. Random-effect meta-analyses were used to compute the summary odds ratio of PTB among women with caries versus women without caries, and the mean difference in either DMFT or DMFS indices between women experiencing PTB compared to those without PTB.

**Results:** Nine observational studies (4826 pregnancies) were included. Women affected by dental caries during pregnancy did not show a significantly higher risk of PTB (RR: 1.16, 95%CI: 0.90; 1.49,  $p= 0.25$ ). Also, the women with PTB did not show significantly higher DMFT or DMFS indices (summary mean differences: 1.56,  $p= 0.10$ ; and -0.15,  $p= 0.9$ , respectively).

**Conclusion:** Dental caries does not appear to be a substantial risk factor for PTB.

**PROSPERO Registration number:** CRD42017062573

### Strengths and limitations of this study

- Strength of the study is its robust methodology. We tried to cover all available studies, access data quality and synthesize suitable data.
- Small number of cases in some of the included studies, their design, different follow-up periods and dissimilarity of the population studies are the limitations.
- Similarly, the lack of description or classification of dental caries stage is another limitation due to which the stratification of analysis according to the disease severity could not be performed.

**Keywords:** Dental caries, pregnancy, pregnant woman, risk, preterm birth.

## INTRODUCTION

Preterm birth (PTB) is the major cause of perinatal mortality and morbidity in the developed countries, with an estimated incidence of 5-13%<sup>1-4</sup>. Although advances in neonatal care have led to a reduction in the neonatal mortality rate, these infants remain at risk of developing a wide array of short and long-term complications such as respiratory, gastrointestinal and neurodevelopmental disabilities<sup>4</sup>.

Several risk factors have been associated with PTB; among these, intrauterine infection has emerged as one of the most important factors. Despite this, PTB cannot be considered a unique disease but rather a syndrome characterized by multiple etiology and in which different factors may play a peculiar role<sup>5</sup>.

Periodontal disease have been shown to carry an increased risk for PTB; the rationale for this assumption is based upon the fact that periodontitis may lead to maternal and fetal inflammation, thus triggering the common pathway of preterm parturition syndrome including increased uterine contractility, cervical ripening and decidua/membrane activation<sup>6-11</sup>. Although dental caries, defined as a localized destruction of the tooth and its structure by the acidic by-product produced by the bacteria during the dietary carbohydrate fermentation<sup>12</sup>, is one of the major oral health problems in developed countries, the effect of dental caries on pregnancy outcome have not been consistently explored. Pregnant women are more susceptible to dental caries and gingivitis compared to their non-pregnant counterparts<sup>13</sup>. Several studies reported that dental caries causing bacteria may have some influence on the pregnancy outcome as PTB and/or low birth weight, while in contrary, the other showed no association between these two factors<sup>14,15</sup>.

The primary aim of this systematic review was to explore the association between dental caries and PTB; the secondary aim was to ascertain the differences in dental caries characteristics between women who deliver preterm compared to those who do not deliver preterm.

## METHODOLOGY

### *Protocol, eligibility criteria, information sources and search*

This review was performed according to an a-priori designed protocol and recommended for systematic reviews and meta-analysis<sup>16, 17</sup>.

We developed a search strategy, and a systematic literature search was performed in the following databases: Ovid MEDLINE(R) (In-Process & Other Non-Indexed Citations, Ovid MEDLINE(R), Daily, Ovid MEDLINE(R) and Ovid OLDMEDLINE(R), Embase Classic+ (Ovid), The Web of Science® (Thomson Reuters) and The Cochrane Library (Wiley) and CINAHL Plus (EBSCOhost).

The full search was performed in November 2015 and repeated in December 2016. Supplementary material 1 shows the complete search string as it was performed in Medline. The controlled vocabulary of Medical Subject Headings (MeSH) from Medline, and the Emtree thesaurus from Embase, including sub-headings, were used when applicable. In addition, the search fields; title, abstract and key words, were searched when applicable. In The Web of Science, the search fields, title and topic were used. All references were exported to Endnote™ (x7.4 – Thomson Reuters), where duplicates were removed. There were no restrictions regarding languages or publication year for the searches.

Reference lists of relevant articles and reviews were hand searched for additional reports. Prisma guidelines were followed<sup>18</sup>.

The study was registered with the PROSPERO database (Registration number: CRD42017062573).

### *Study selection, data collection and data items*

The primary outcome was the occurrence of PTB, defined as birth <37 weeks of gestation. We aimed to stratify the analysis according the type of PTB (spontaneous vs iatrogenic) and according to gestational age at birth (moderate to late preterm (<34 weeks), very preterm (<32 weeks) and extremely preterm <28 weeks)<sup>19</sup>.

The secondary outcome was to ascertain the difference between women with dental caries who experienced PTB compared to those who did not experience PTB in either decayed, missing, and filled teeth (DMFT) or decayed, missing, and filled surfaces (DMFS) indices<sup>20</sup>.

1  
2  
3 DMFT and DMFS indices are numerical expression of the caries prevalence of an individual or  
4 groups and is widely used in epidemiological surveys of oral health. DMFT/DMFS is calculated  
5 by adding up permanent teeth that are caries affected wherein D is for decay, M is missing due to  
6 caries and F is filled teeth (T) or surfaces (S). If one tooth has filling as well as caries lesion, then  
7 it is counted as D for DMFT index whereas filling+caries surface is counted as D but if there is F  
8 on one and D in other surface, then they are counted differently for DMFS index. The anterior  
9 teeth up to canine have 4 and pre-molars and molars teeth have 5 surfaces, respectively in DMFS  
10 index. D+M+F = caries prevalence of an individual [maximum of 28 for DMFT and 128 for  
11 DMFS, if 28 permanent teeth are included (excluding 4 wisdom molar teeth)]<sup>20, 21</sup>.

12  
13  
14  
15  
16  
17  
18  
19  
20 Studies were assessed according to the following criteria: population, outcome, gestational age at  
21 birth and clinical characteristics of the caries during pregnancy.

22  
23 Two authors (MW, FD) reviewed all abstracts independently. Agreement regarding potential  
24 relevance was reached by consensus; full text copies of those papers were obtained and the same  
25 two reviewers independently extracted relevant data regarding study characteristics and  
26 pregnancy outcome. Inconsistencies were discussed among the reviewers and consensus reached.  
27 Any dispute was resolved by discussion with a third author. If more than one study was published  
28 for the same cohort with identical endpoints, the report containing the most comprehensive  
29 information on the population was included to avoid overlapping populations. For those articles  
30 in which information was not reported but the methodology was such that this information would  
31 have been recorded initially, the authors were contacted.

32  
33  
34  
35  
36  
37  
38  
39 Quality assessment of the included studies was performed using the Newcastle-Ottawa Scale  
40 (NOS)<sup>22</sup>; according to NOS, each study is judged on three broad perspectives: the selection of the  
41 study groups; the comparability of the groups; and the ascertainment outcome of interest.  
42 Assessment of the selection of a study includes the evaluation of the representativeness of the  
43 exposed cohort, selection of the non-exposed cohort, ascertainment of exposure and the  
44 demonstration that outcome of interest was not present at start of study. Assessment of the  
45 comparability of the study includes the evaluation of the comparability of cohorts on the basis of  
46 the design or analysis. Finally, the ascertainment of the outcome of interest includes the  
47 evaluation of the type of the assessment of the outcome of interest, length and adequacy of  
48 follow-up. According to NOS, a study can be awarded a maximum of one star for each numbered  
49  
50  
51  
52  
53  
54  
55  
56  
57

1  
2  
3 item within the Selection and Outcome categories. A maximum of two stars can be given for  
4 Comparability<sup>22</sup>.

5  
6 Only full text articles were considered eligible for the inclusion. Case reports, conference  
7 abstracts and case series with fewer than 3 cases were also excluded to avoid publication bias.  
8  
9

### 10 ***Statistical analysis***

11  
12 A first random-effect meta-analysis of binary outcomes was used to compute the summary odds  
13 ratio (and relative 95% confidence interval - CI) of preterm birth (PTB) among women with  
14 caries versus women without caries (controls).  
15  
16

17 Other two meta-analyses evaluated continuous outcomes: decayed, missing and filled teeth  
18 (DMFT), and decayed, missing and filled surfaces (DMFS). As the included studies did not differ  
19 in their outcome definitions, we used a random-effect approach to compute the mean difference  
20 in either DMFT or DMFS between PTB and non-PTB. In one study by Martinez-Martinez, the  
21 standard deviations were not available, and we thus conservatively used the largest values  
22 recorded in the other included studies.  
23  
24  
25  
26

27 For all meta-analyses, the heterogeneity across studies was quantified using  $I^2$  statistic, and all  
28 computations were made using Review Manager (RevMan), version 5.3 (Copenhagen: The  
29 Nordic Cochrane Centre, The Cochrane Collaboration, 2014).  
30  
31  
32  
33  
34  
35  
36  
37  
38  
39  
40  
41  
42  
43  
44  
45  
46  
47  
48  
49  
50  
51  
52  
53  
54  
55  
56  
57  
58  
59  
60



## RESULTS

### *General characteristics*

A total of 1786 articles were identified, 20 were assessed with respect to their eligibility for inclusion (Supplementary Material 2) and 9 studies were included in the systematic review (Table 1, Figure 1). These 9 studies included 4826 pregnancies.

Results of quality assessment of the included studies using NOS for cohort studies are presented in Table 2. Most of the included studies showed an overall good rate about the selection and comparability of the study groups, and for the ascertainment of the outcome of interest. The main weaknesses of these studies were their retrospective design, small sample size with even smaller number of events (PTB) and different gestational ages at assessment.

### *Synthesis of the results*

Five studies explored the risk of PTB in women who compared to those who did not have caries during pregnancy and reported that women affected by caries in pregnancy did not have an increased risk of delivering <37 weeks of gestation (RR: 1.16, 95% CI 0.90; 1.49, p= 0.25; I<sup>2</sup>: 34%). (Figure 2).

There was no difference in either DMFT (1.56, 95% CI -0.28; 3.41, p= 0.10) and DMFS (-0.15 (-3.40; 3.09, p= 0.9) (Table 3) (Figure 3).

Due to very small number of included cases and lack of information from the original study, it was not possible to perform any sub-analysis according to different gestational age at birth and type of PTB (spontaneous vs iatrogenic).

## DISCUSSIONS

### *Summary of evidence*

The findings from this systematic review showed that pregnant women with dental caries are not at increased risk for PTB. Furthermore, there was no difference in the mean DMFT and DMFS indices between women with dental caries who experienced PTB compared to those who did not.

### *Strength and limitations*

The strength of this meta-analysis is its robust methodology. We tried to cover all available studies, assess the quality of the data and synthesize all suitable data.

The small number of cases in some of the included studies, their retrospective non-randomized design, different periods of follow-up, dissimilarity of the populations studied (due to various inclusion criteria) and lack of standardized criteria for the antenatal management of pregnancies with dental caries represent the major limitations of this systematic review. The lack of description or classification of caries stage in the studies included is another limitation of our review and it was not possible to stratify the analysis according to the severity of the disease. Assessment of the potential publication bias was also problematic because of the nature of the outcome evaluated (outcome rates with the left-side limited to a value of zero), which limits the reliability of funnel plots, and because of the small number of individual studies, which strongly limits the reliability of formal tests.

### *Implication for clinical practice*

The consequences of overall oral health including the oral health in pregnant women is of a great concern<sup>23</sup>. Dental caries and periodontal disease are the most common oral diseases worldwide. The higher prevalence of gingival alterations during pregnancy, especially bleeding during brushing, is a problem that is commonly encountered by pregnant women. Properly maintained oral hygiene care is known to have an impact on the oral health of pregnant women<sup>24, 25</sup> and availability of free dental care also appears to influence this<sup>26</sup>. Whereas in contrast, if proper oral hygiene is not maintained during pregnancy, the chances to develop oral health problems as enamel erosions, dental caries<sup>27</sup> and gingivitis increases.

There are no reports indicating that the incidence of dental caries increases during pregnancy, but it has been suggested that the chances of getting dental caries increases because of the change in

1  
2  
3 diet, frequent snacking due to food craving and poor oral health<sup>28</sup>. Furthermore, the prevalence of  
4 dental caries seemed to be higher in older pregnant women<sup>29</sup>. Despite the high caries prevalence  
5 in most developed countries, very few studies have explored the potential association between  
6 oral health and adverse pregnancy outcome.  
7  
8  
9

10  
11 Identification of women at higher risk of PTB is fundamental to prevent the likelihood of  
12 delivering preterm. Several risk factors as been associated with PTB, such as prior history of  
13 PTB, cervical disease and infection. Despite this, finding an association between a given risk  
14 factor and the occurrence of PTB is challenging.  
15  
16  
17  
18  
19

20 Dental caries is a frequently encountered oral health problem in pregnancy as pregnant women  
21 are more susceptible to caries compared to non-pregnant women<sup>13</sup>. Being caused by an infectious  
22 process, caries can theoretically lead to inflammation and thus increase the risk of PTB<sup>12</sup>. Despite  
23 this, we could not find any significant association between dental caries and PTB; furthermore,  
24 we did not find any significant difference in the severity of caries assessed by DMFT and DMFS  
25 indices between women who experienced PTB compared to those who did not.  
26  
27  
28  
29

30 The lack of association between dental caries and PTB is difficult to explain. The initiation and  
31 progression of the caries lesion is very slow and the destruction caused by caries in initial stage  
32 can be reversible<sup>12</sup>. In addition to this, pregnancy itself does not cause dental caries but it may  
33 exacerbate the existing condition. Dental caries is symptomless until there is severe and  
34 irreversible destruction of teeth<sup>30</sup>. It might be possible that bacterial spreading during caries  
35 formation and the subsequent production of pro-inflammatory mediators induced by oral  
36 pathogens may not be of the magnitude to cause production of pro-inflammatory mediators  
37 enough to initiate PTB.  
38  
39  
40  
41  
42  
43

44 Even though we found no significant relationship between the dental caries and PTB, the risk of  
45 transmitting the oral cariogenic flora from the mother to her infant and predisposing the infant to  
46 dental caries in the future should not be neglected<sup>31-34</sup>. Therefore, large prospective studies  
47 aiming at ascertaining the association between dental caries and spontaneous PTB, according to  
48 the gestational age at occurrence, severity of the disease and presence of other co-morbidities are  
49 needed in order to elucidate the role, if any, of dental caries in increasing the risk of PTB.  
50  
51  
52  
53  
54  
55  
56  
57  
58  
59  
60

## REFERENCES

1. Goldenberg RL, Culhane JF, Iams JD, Romero R. Epidemiology and causes of preterm birth. *Lancet*. 2008;371(9606):75-84.
2. Slattery MM, Morrison JJ. Preterm delivery. *Lancet*. 2002;360(9344):1489-97.
3. McCormick MC. The contribution of low birth weight to infant mortality and childhood morbidity. *N Engl J Med*. 1985;312(2):82-90.
4. Saigal S, Doyle LW. An overview of mortality and sequelae of preterm birth from infancy to adulthood. *Lancet*. 2008;371(9608):261-9.
5. Romero R, Espinoza J, Kusanovic JP, Gotsch F, Hassan S, Erez O, et al. The preterm parturition syndrome. *BJOG*. 2006;113(Suppl 3):S17-42.
6. Jeffcoat MK, Geurs NC, Reddy MS, Goldenberg RL, Hauth JC. Current evidence regarding periodontal disease as a risk factor in preterm birth. *Ann Periodontol*. 2001;6:183-88.
7. Offenbacher S. Maternal periodontal infections, prematurity, and growth restriction. *Clin Obstet Gynecol*. 2004;47:808-21.
8. Offenbacher S, Boggess KA, Murtha AP, Jared HL, Lieff S, McKaig RG, et al. Progressive periodontal disease and risk of very preterm delivery. *Obstet Gynecol*. 2006;107(1):29-36.
9. Jarjoura K, Devine PC, Perez-Delboy A, Herrera-Abreu M, D'Alton M, Papapanou PN. Markers of periodontal infection and preterm birth. *Am J Obstet Gynecol*. 2005;192:513-19.
10. Goepfert AR, Jeffcoat MK, Andrews WW, Faye-Petersen O, Cliver SP, Goldenberg RL, et al. Periodontal disease and upper genital tract inflammation in early spontaneous preterm birth. *Obstet Gynecol*. 2004;104(4):777-83.
11. Xiong X, Buekens P, Fraser WD, Beck J, Offenbacher S. Periodontal disease and adverse pregnancy outcomes: a systematic review. *BJOG*. 2006;113:135-43.
12. Selwitz RH, Ismail AI, Pitts NB. Dental caries. *Lancet*. 2007;369(9555):51-9.
13. Martinez-Beneyto Y, Vera-Delgado MV, Perez, L, Maurandi A. Self-reported oral health and hygiene habits, dental decay, and periodontal condition among pregnant European women. *Int J Gynecol Obstet*. 2011;114(1):18-22.
14. Dasanayake AP, Li Y, Wiener H, Ruby JD, Lee MJ. Salivary *Actinomyces naeslundii* genospecies 2 and *Lactobacillus casei* level predicts pregnancy outcome. *J Periodontol*. 2005;76(2):171-77.
15. Durand R, Gunselman EL, Hodges JS, DiAngelis AS, Michalowicz BS. A pilot study of the association of cariogenic bacteria and preterm birth. *Oral Dis*. 2009;15(6):400-06.
16. Henderson LK, Craig JC, Willis NS, Tovey D, Webster AC. How to write a Cochrane systematic review. *Nephrology (Carlton)* 2010;15(6):617-24.
17. NHS Centre for Reviews and Dissemination. Systematic reviews: CRD's guidance for undertaking reviews in health care. University of York: York (UK). 2009.
18. Moher D, Shamseer L, Clarke M, Ghersi D, Liberati A, Petticrew M, et al. Preferred reporting items for systematic review and meta-analysis protocols (PRISMA-P) 2015

- statement. *Syst Rev* 2015;4:1. Available at <http://www.prisma-statement.org/> [accessed 20 April 2017].
19. World Health Organization. Preterm birth. 2017 [online] Available at <http://www.who.int/mediacentre/factsheets/fs363/en/> [Accessed 3 May 2017].
  20. World Health Organization. Oral health surveys: basic methods. 4<sup>th</sup> ed. 1997 Geneva.
  21. Malmo University. Caries prevalence and Calculation. 2010 [online] Available at <https://www.mah.se/CAPP/Methods-and-Indices/for-Caries-prevalence/> [Accessed 11 April 2017]
  22. Wells GA, Shea B, O'Connell D, Peterson J, Welch V, Losos M, Tugwell P. [Newcastle-Ottawa Scale (NOS) for assessing the quality of nonrandomized studies in meta-analyses. The Ottawa Hospital Research Institute. Available at: [http://www.ohri.ca/programs/clinical\\_epidemiology/oxford.asp](http://www.ohri.ca/programs/clinical_epidemiology/oxford.asp) [Accessed 3 May 2017]
  23. Achtari MD, Georgakopoulou EA, Afentoulide N. Dental care throughout pregnancy: what a dentists must know. *Oral Health Dent Manag.* 2012;11(4):169-76.
  24. Huebner CE, Milgrom P, Conrad, D. et al. Providing dental care to pregnant patients: a survey of Oregon general dentists. *J Am Dent Assoc.* 2009;140(2):211-22.
  25. Boggess KA, Urlaub DM, Massey KE, Moos MK, Matheson MB, Lorenz C. Oral hygiene practice and dental service utilization among pregnant women. *J Am Dent Assoc.* 2010;141(5): 553-61.
  26. Hulla E, Turok Y, Nauta M, Yoong W. Self-reported oral hygiene habits, dental attendance and attitudes to dentistry during pregnancy in a sample of immigrant women in North London. *Arch Gynecol Obstet.* 2008;277(5):405-09.
  27. Merglova V, Hecova H, Stehlikova J, Chaloupka P (2012) Oral health status of women with high-risk pregnancies. *Biomed Pap Med Fac Univ Palacky Olomouc Czech Repub.* 2012; 156(4):337-41.
  28. Gajendra S, Kumar JV. Oral health and pregnancy: a review. *N Y State Dent J.* 2004;70(1): 40-4.
  29. Shamsi M, Hidarnia A, Niknami S, Khorsandi M. The status of dental caries and some acting factors in a sample of Iranian women with pregnancy. *World J Med Sci.* 2013;9(4):190-97. ISSN 1817-3055. DOI: 10.5829/idosi.wjms.2013.9.4.76161
  30. Kloetzel MK, Huebner CE, Milgrom P. Referrals for dental care during pregnancy. *J Midwifery Womens Health.* 2011;56(2):110-17.
  31. Zanata RL, Navarro MF, Pereira JC, Franco EB, Lauris JR, Barbosa SH. Effect of caries preventive measures directed to expectant mothers on caries experience in their children. *Braz Dent J.* 2003;14(2):75-81.
  32. Goldie MP. Oral health care for pregnant and postpartum women. *Int J Dent Hyg.* 2003;1(3):174-6.
  33. Boggess KA, Edelstein BL. Oral health in women during preconception and pregnancy: implications for birth outcomes and infant oral health. *Matern Child Health J.* 2006;10 (5 Suppl):S169-74.
  34. Boggess KA, Society for Maternal-Fetal Medicine Publications Committee. Maternal oral health in pregnancy. *Obstet Gynecol.* 2008;111(4):976-86.

1  
2  
3 **TABLES**  
4

5 **Table 1.** General characteristics of the included studies.  
6

| 7 <b>Author</b>     | <b>Year</b> | <b>Country</b> | <b>Period analyzed (y)</b> | <b>Study design</b> | <b>Gestational age at dental examination</b>                   | <b>Number of subject (n)</b> | <b>Definition of PTB</b> |
|---------------------|-------------|----------------|----------------------------|---------------------|----------------------------------------------------------------|------------------------------|--------------------------|
| 8 Martinez-Martinez | 2016        | Mexico         | 2013-2014                  | Retrospective       | From the first trimester of pregnancy until 8 weeks postpartum | 70                           | <37 weeks                |
| 9 Durand            | 2015        | France         | 2005-2006                  | Prospective         | Within 8 weeks after delivery                                  | 107                          | <37 weeks                |
| 10 Harjunmaa        | 2015        | Malawi         | 2011-2013                  | Prospective         | Within 6 weeks after delivery                                  | 1024                         | <37 weeks                |
| 11 Acharya          | 2013        | India          | 2009                       | Retrospective       | Within 1 day after delivery                                    | 316                          | <37 weeks                |
| 12 Vergnes          | 2011        | France         | 2003-2006                  | Retrospective       | Within 2–4 days post-partum                                    | 2201                         | <37 weeks                |
| 13 Ryalat           | 2011        | Jordan         | 2009                       | Prospective         | Within 1 week post-partum                                      | 200                          | <37 weeks                |
| 14 Heimonen         | 2008        | Finland        | 2002-2004                  | Retrospective       | Within 2 days post-partum                                      | 328                          | <37 weeks                |
| 15 Mumghamba        | 2007        | Tanzania       | NS                         | Retrospective       | Within 40 days from delivery                                   | 373                          | <37 weeks                |
| 16 Meurman          | 2006        | Finland        | 1998-2000                  | Retrospective       | From the first trimester of pregnancy                          | 207                          | <37 weeks                |

17  
18  
19  
20  
21  
22  
23  
24  
25  
26  
27  
28  
29  
30  
31  
32  
33  
34  
35  
36  
37  
38  
39  
40  
41  
42  
43  
44  
45  
46  
47

**Table 2.** Quality assessment of the included studies according to Newcastle-Ottawa Scale (NOS) a study can be awarded a maximum of one star for each numbered item within the Selection and Outcome categories. A maximum of two stars can be given for Comparability.

| Author            | Year | Selection | Comparability | Outcome |
|-------------------|------|-----------|---------------|---------|
| Martinez-Martinez | 2016 | ★★        | ★             | ★       |
| Durand            | 2016 | ★★★       | ★★            | ★★      |
| Harjunmaa         | 2015 | ★★        | ★             | ★       |
| Acharya           | 2015 | ★★        | ★             | ★★      |
| Vergnes           | 2015 | ★★★       | ★★            | ★       |
| Ryalat            | 2015 | ★★★       | ★             | ★★      |
| Heimonen          | 2014 | ★★        | ★             | ★       |
| Mumghamba         | 2010 | ★★        | ★             | ★       |
| Meurman           | 2009 | ★★        | ★             | ★       |

**Table 3.** Selected outcomes evaluating the association between caries and preterm birth.

| <b>Outcomes</b>                                        | <b>N. studies<br/>(n/N)</b> | <b>Odds Ratio<br/>(95% CI)</b>      | <b>p</b> | <b>I<sup>2</sup>, %</b> |
|--------------------------------------------------------|-----------------------------|-------------------------------------|----------|-------------------------|
| Preterm birth (PTB), women with caries versus controls | 5<br>(1472/4246)            | 1.16 (0.90; 1.49)                   | 0.25     | 35                      |
|                                                        |                             |                                     |          |                         |
|                                                        | <b>N. studies<br/>(n/N)</b> | <b>Mean difference<br/>(95% CI)</b> | <b>p</b> | <b>I<sup>2</sup>, %</b> |
|                                                        |                             |                                     |          |                         |
| DMFT (PTB versus Non-PTB)                              | 5 (2963)                    | 1.56 (-0.28; 3.41)                  | 0.10     | 92                      |
|                                                        |                             |                                     |          |                         |
| DMFS (PTB versus Non-PTB)                              | 3 (2594)                    | -0.15 (-3.40; 3.09)                 | 0.9      | 89                      |
|                                                        |                             |                                     |          |                         |

CI: Confidence interval. n: number of events. N: total number of participants. DMFT: Decayed, missed, and filled teeth. DMFS: Decayed, missed, and filled surface.



## FIGURES

Figure 1. Systematic review flowchart

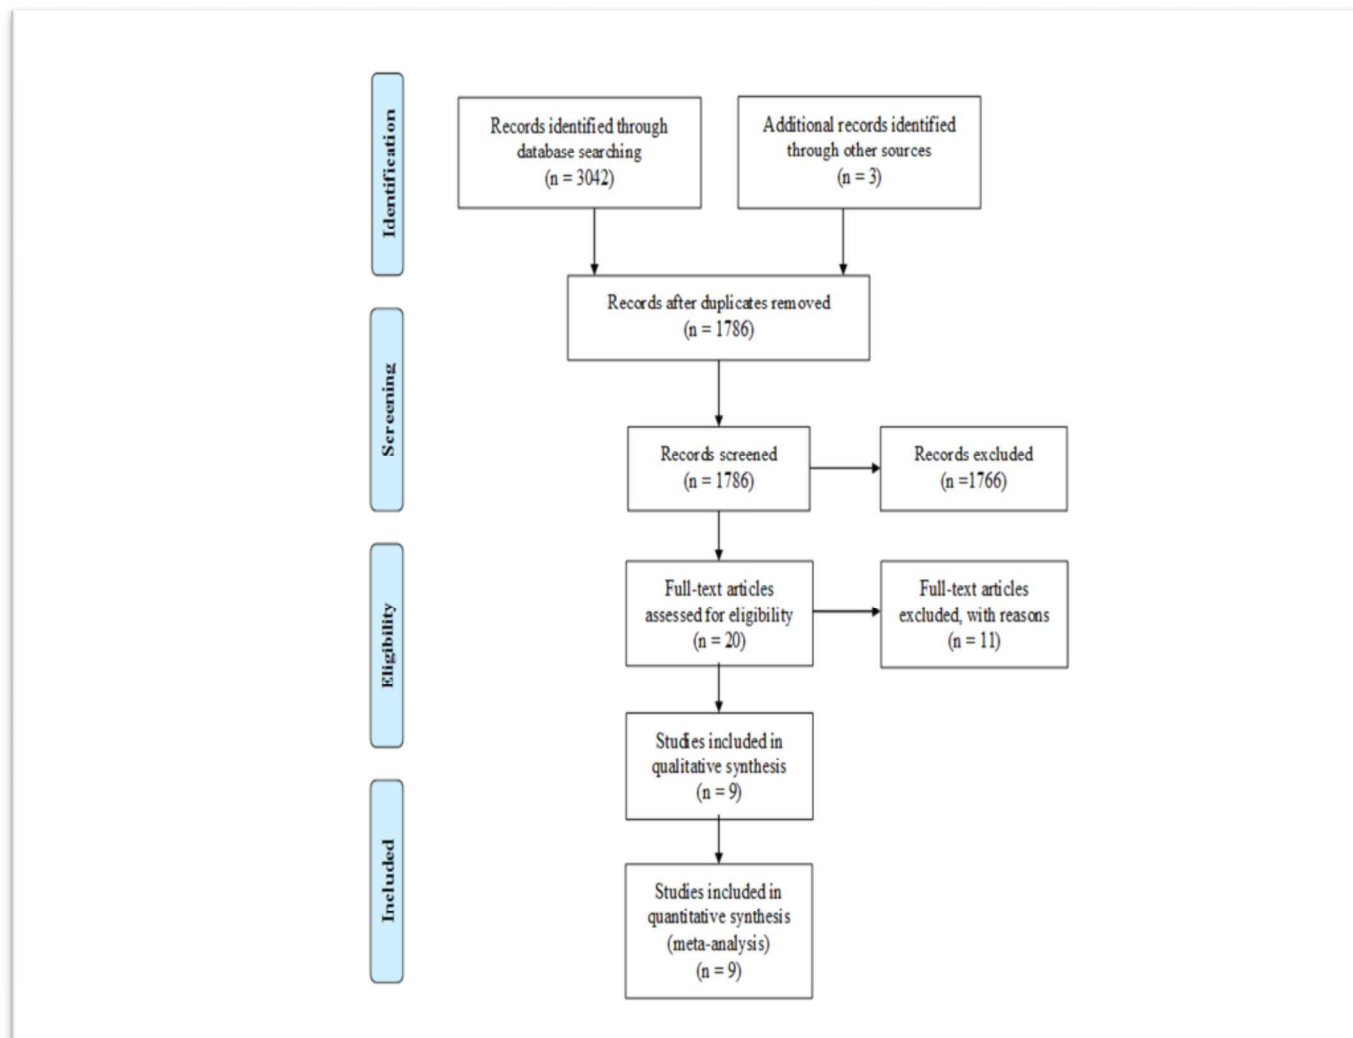

**Figure 2.** Pooled odd ratio (OR) for the risk of preterm birth (PTB) in women compared with those without caries.

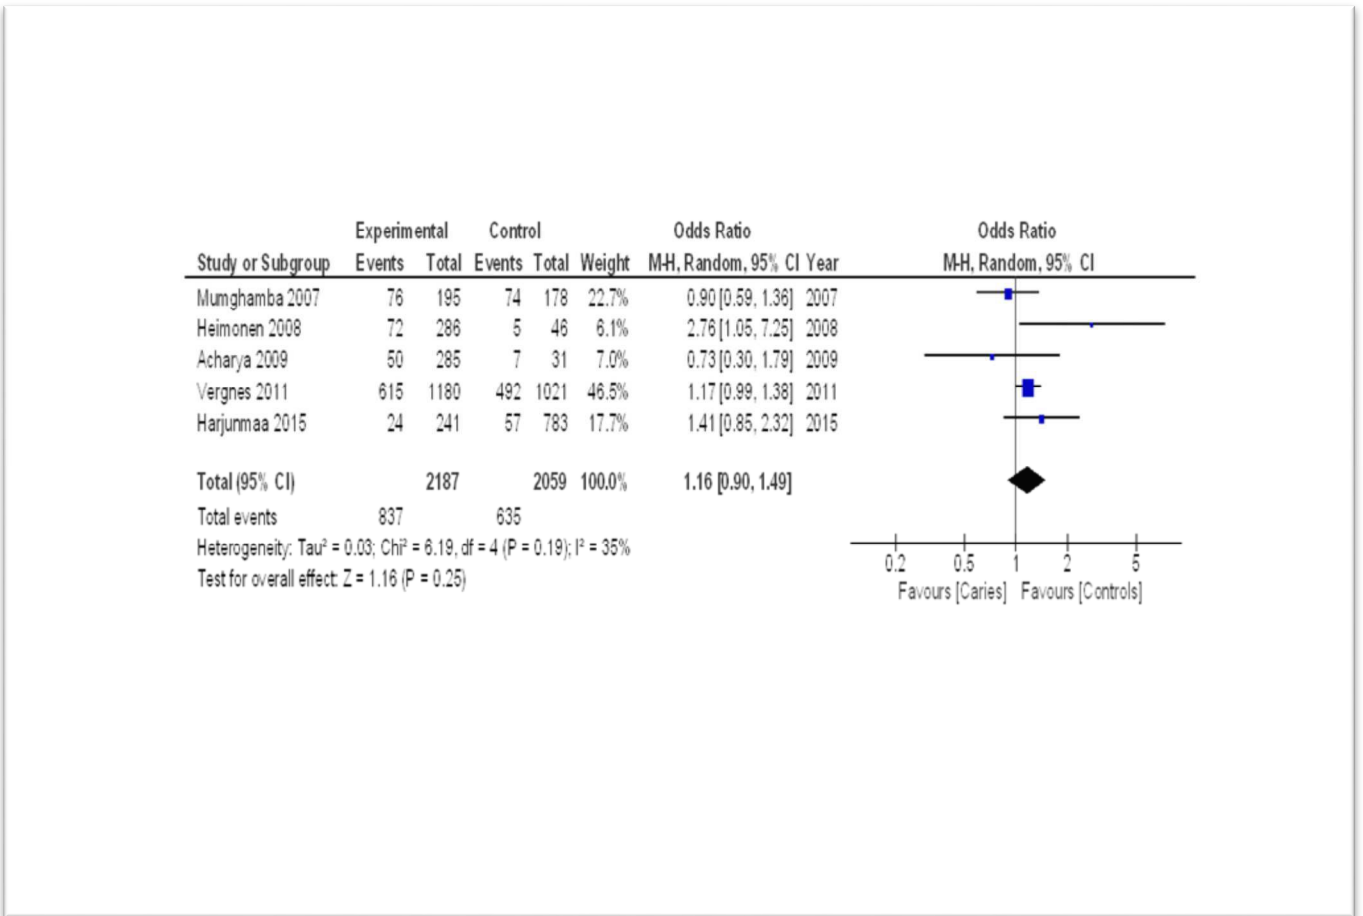

Only

**Figure 3.** Mean differences in DMFT and DMFS indices in women with caries compared to those who did not experience PTB.

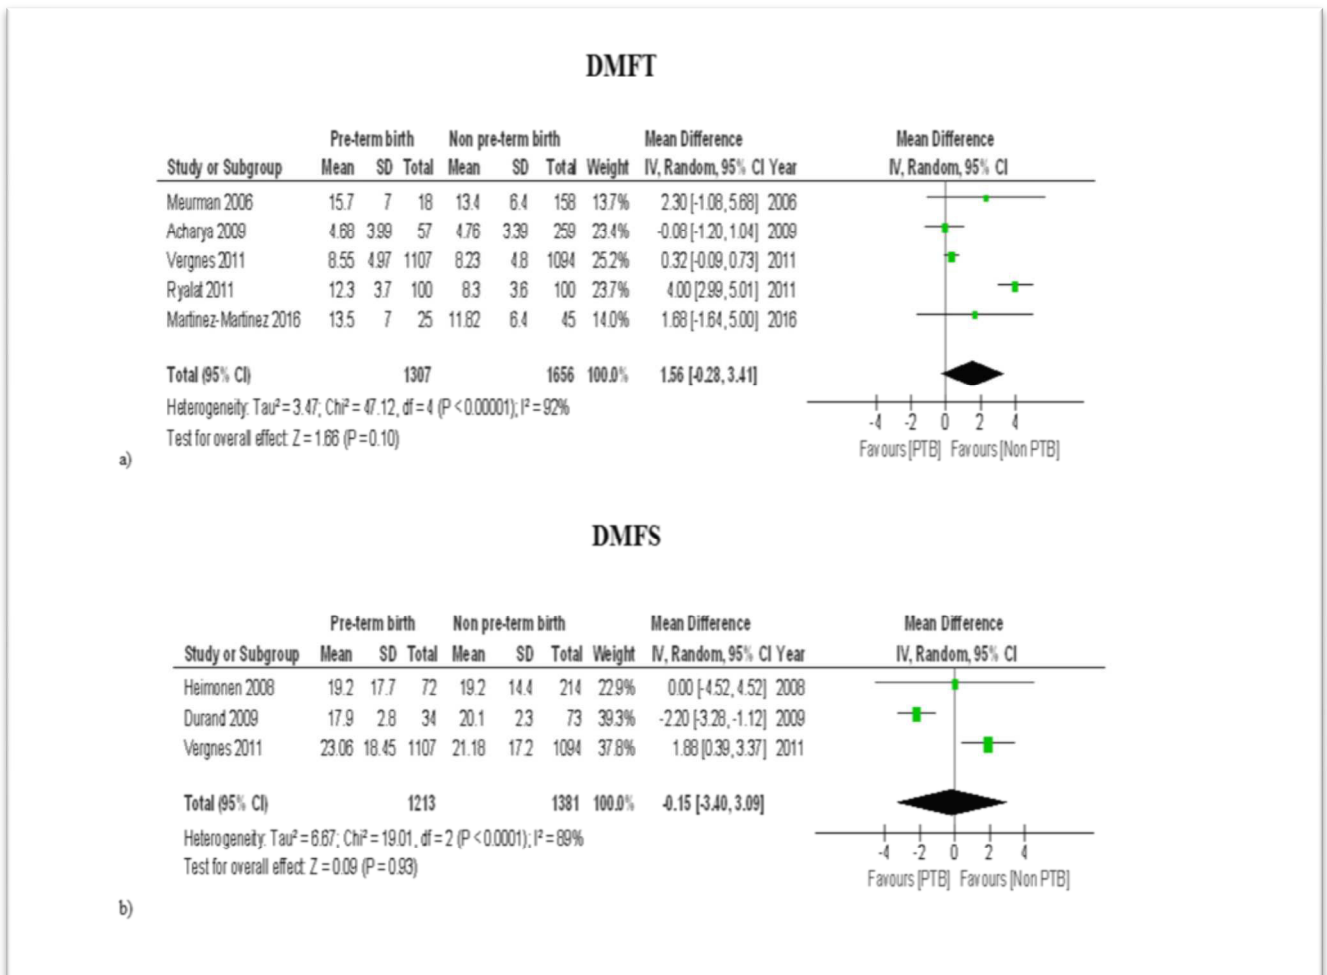

## **FUNDING**

No funding was received for the conduction of this review.

The publication charges for this article have been funded by a grant from the publication fund of UiT The Arctic University of Norway.

## **CONTRIBUTORS**

Study concept, design and methodology - MW, GA, FD'A, ER

Data Collection and entry - ER

Abstracts and articles review - MW, FD'A

Analysis and interpretation of data - F'DA, MW, GO, LM

Supervision - FD'A, GA, PB, TAT

Writing, review, critique, comments and revision of manuscript- MW, FD'A, ER, TAT, PB, GO, LM, GA

## **ACKNOWLEDGEMENT**

We would sincerely like to thank Prof. S Acharya, Prof. S Abati, Prof. I Cetin, Prof. GG Campus, Prof. A Villa, Prof. R Martinez, Prof. S Ryalat, Prof. JH Meurman, Prof. Y Khader, Prof. A Heimonen, Prof. U Harjunmaa, Prof. R Durand, Prof. N Buduneli and Prof. AP Dasanayake for their co-operation and contribution by providing additional data and necessary information for this systemic review.

## **COMPETING INTERESTS**

The authors declare that they have no competing interests.

## **DATA SHARING STATEMENT**

No additional data is available.

1  
2  
3  
4  
5  
6  
7  
8  
9  
10  
11  
12  
13  
14  
15  
16  
17  
18  
19  
20  
21  
22  
23  
24  
25  
26  
27  
28  
29  
30  
31  
32  
33  
34  
35  
36  
37  
38  
39  
40  
41  
42  
43  
44  
45  
46  
47  
48  
49  
50  
51  
52  
53  
54  
55  
56  
57  
58  
59  
60

**ABBREVIATION**

DMFS – Decayed, Missing, Filled Surface

DMFT- Decayed, Missing, Filled Teeth

NOS - Newcastle-Ottawa Scale

PTB – Preterm Birth

For peer review only

## Supplementary material 1

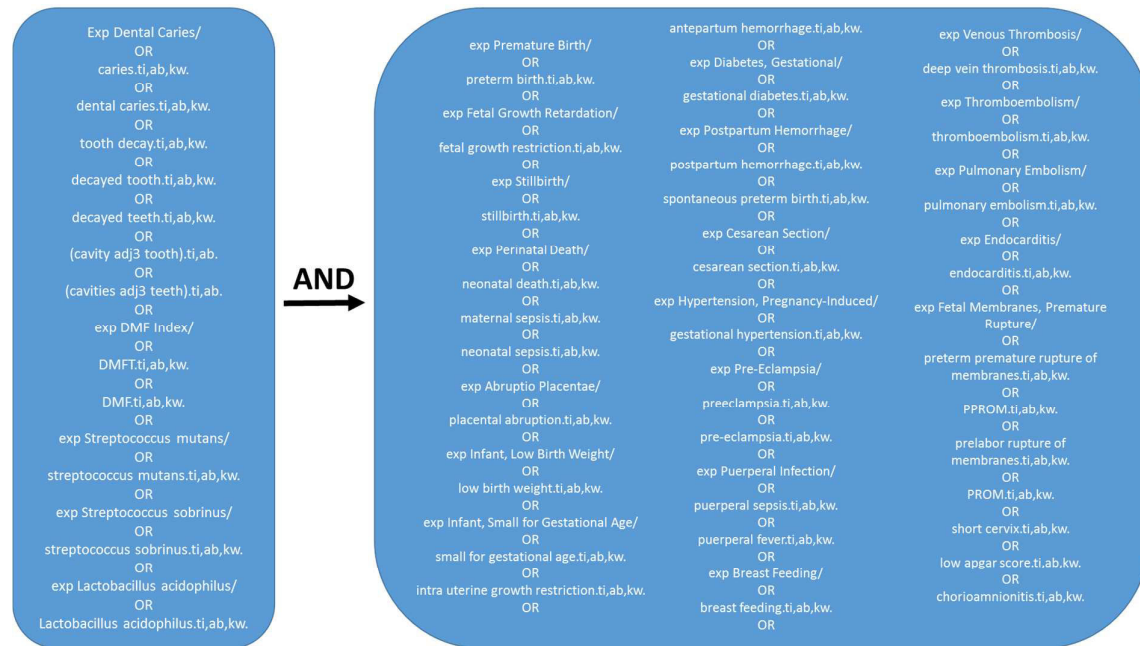

**Supplementary Table 2.** Excluded studies and reason for the exclusion.

| Author     | Year | Title                                                                                                                      | Reason for the exclusion                                                                                                                                                                                                                                                            |
|------------|------|----------------------------------------------------------------------------------------------------------------------------|-------------------------------------------------------------------------------------------------------------------------------------------------------------------------------------------------------------------------------------------------------------------------------------|
| Saraiva    | 2007 | Are intrauterine growth restriction and preterm birth associated with dental caries?                                       | No data on caries in pregnancy                                                                                                                                                                                                                                                      |
| Shulman    | 2005 | Is There an Association between Low Birth Weight and Caries in the Primary Dentition?                                      | No data on caries in pregnancy                                                                                                                                                                                                                                                      |
| Saraiva    | 2009 | Intrauterine Growth Restriction and Preterm Birth Were not Associated with Primary Teeth Caries                            | No data on caries in pregnancy                                                                                                                                                                                                                                                      |
| Sayyed     | 2014 | The relationship between term pre-eclampsia and the risk of early childhood caries                                         | No data on caries in pregnancy                                                                                                                                                                                                                                                      |
| Merglova   | 2012 | Oral health status of women with high-risk pregnancies                                                                     | No data on the outcomes explored in this systematic review                                                                                                                                                                                                                          |
| Dasanayake | 2005 | Salivary Actinomyces naeslundii Genospecies 2 and Lactobacillus casei Levels Predict Pregnancy Outcomes                    | No data on the outcomes explored in this systematic review                                                                                                                                                                                                                          |
| Khader     | 2007 | Risk Indicators of Pre-Eclampsia in North Jordan: Is Dental Caries Involved?                                               | No data on caries and PTB                                                                                                                                                                                                                                                           |
| Bosniak    | 2006 | Pre-term delivery and periodontal disease: a case-control study from Croatia                                               | No data on the outcomes explored in this systematic review                                                                                                                                                                                                                          |
| Budeli     | 2005 | Periodontal infections and pre-term low birth weight: a case-control study                                                 | The number of decayed teeth were provided as a continuous variable; thus it was not possible to extrapolate any data regarding the occurrence of PTB in women with compared to those without caries. Furthermore, no information on the DMFT score was provided by the authors.     |
| Durand     | 2009 | A pilot study of the association between cariogenic oral bacteria and preterm birth                                        | It was not possible to extrapolate data regarding the occurrence of PTB in pregnancies with compared to those without caries; furthermore, it was not possible to extract any information regarding the mean DMFT values in women who compared to those who did not deliver preterm |
| Abati      | 2012 | Lack of association between maternal periodontal status and adverse pregnancy outcomes: a multicentric epidemiologic study | It was not possible to extrapolate data regarding the occurrence of PTB in pregnancies with compared to those without caries; furthermore, it was not possible to extract any information regarding the mean DMFT values in women who compared to                                   |

1  
2  
3  
4  
5  
6  
7  
8  
9  
10  
11  
12  
13  
14  
15  
16  
17  
18  
19  
20  
21  
22  
23  
24  
25  
26  
27  
28  
29  
30  
31  
32  
33  
34  
35  
36  
37  
38  
39  
40  
41  
42  
43  
44  
45  
46  
47

|  |  |  |               |
|--|--|--|---------------|
|  |  |  | those who did |
|--|--|--|---------------|

For peer review only



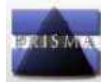

# PRISMA 2009 Checklist

| Section/topic                      | #  | Checklist item                                                                                                                                                                                                                                                                                              | Reported on page # |
|------------------------------------|----|-------------------------------------------------------------------------------------------------------------------------------------------------------------------------------------------------------------------------------------------------------------------------------------------------------------|--------------------|
| <b>TITLE</b>                       |    |                                                                                                                                                                                                                                                                                                             |                    |
| Title                              | 1  | Identify the report as a systematic review, meta-analysis, or both.                                                                                                                                                                                                                                         | 1                  |
| <b>ABSTRACT</b>                    |    |                                                                                                                                                                                                                                                                                                             |                    |
| Structured summary                 | 2  | Provide a structured summary including, as applicable: background; objectives; data sources; study eligibility criteria, participants, and interventions; study appraisal and synthesis methods; results; limitations; conclusions and implications of key findings; systematic review registration number. | 2                  |
| <b>INTRODUCTION</b>                |    |                                                                                                                                                                                                                                                                                                             |                    |
| Rationale                          | 3  | Describe the rationale for the review in the context of what is already known.                                                                                                                                                                                                                              | 3                  |
| Objectives                         | 4  | Provide an explicit statement of questions being addressed with reference to participants, interventions, comparisons, outcomes, and study design (PICOS).                                                                                                                                                  | 3                  |
| <b>METHODS</b>                     |    |                                                                                                                                                                                                                                                                                                             |                    |
| Protocol and registration          | 5  | Indicate if a review protocol exists, if and where it can be accessed (e.g., Web address), and, if available, provide registration information including registration number.                                                                                                                               | 4                  |
| Eligibility criteria               | 6  | Specify study characteristics (e.g., PICOS, length of follow-up) and report characteristics (e.g., years considered, language, publication status) used as criteria for eligibility, giving rationale.                                                                                                      | 4                  |
| Information sources                | 7  | Describe all information sources (e.g., databases with dates of coverage, contact with study authors to identify additional studies) in the search and date last searched.                                                                                                                                  | 4                  |
| Search                             | 8  | Present full electronic search strategy for at least one database, including any limits used, such that it could be repeated.                                                                                                                                                                               | 4                  |
| Study selection                    | 9  | State the process for selecting studies (i.e., screening, eligibility, included in systematic review, and, if applicable, included in the meta-analysis).                                                                                                                                                   | 4-5                |
| Data collection process            | 10 | Describe method of data extraction from reports (e.g., piloted forms, independently, in duplicate) and any processes for obtaining and confirming data from investigators.                                                                                                                                  | 4-5                |
| Data items                         | 11 | List and define all variables for which data were sought (e.g., PICOS, funding sources) and any assumptions and simplifications made.                                                                                                                                                                       | 4-5                |
| Risk of bias in individual studies | 12 | Describe methods used for assessing risk of bias of individual studies (including specification of whether this was done at the study or outcome level), and how this information is to be used in any data synthesis.                                                                                      | 5                  |
| Summary measures                   | 13 | State the principal summary measures (e.g., risk ratio, difference in means).                                                                                                                                                                                                                               | 5-6                |
| Synthesis of results               | 14 | Describe the methods of handling data and combining results of studies, if done, including measures of consistency (e.g., $I^2$ ) for each meta-analysis.                                                                                                                                                   | 6                  |

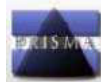

# PRISMA 2009 Checklist

Page 1 of 2

| Section/topic                 | #  | Checklist item                                                                                                                                                                                           | Reported on page # |
|-------------------------------|----|----------------------------------------------------------------------------------------------------------------------------------------------------------------------------------------------------------|--------------------|
| Risk of bias across studies   | 15 | Specify any assessment of risk of bias that may affect the cumulative evidence (e.g., publication bias, selective reporting within studies).                                                             | 6                  |
| Additional analyses           | 16 | Describe methods of additional analyses (e.g., sensitivity or subgroup analyses, meta-regression), if done, indicating which were pre-specified.                                                         | 6                  |
| <b>RESULTS</b>                |    |                                                                                                                                                                                                          |                    |
| Study selection               | 17 | Give numbers of studies screened, assessed for eligibility, and included in the review, with reasons for exclusions at each stage, ideally with a flow diagram.                                          | 7                  |
| Study characteristics         | 18 | For each study, present characteristics for which data were extracted (e.g., study size, PICOS, follow-up period) and provide the citations.                                                             | 7                  |
| Risk of bias within studies   | 19 | Present data on risk of bias of each study and, if available, any outcome level assessment (see item 12).                                                                                                | 7                  |
| Results of individual studies | 20 | For all outcomes considered (benefits or harms), present, for each study: (a) simple summary data for each intervention group (b) effect estimates and confidence intervals, ideally with a forest plot. | 7                  |
| Synthesis of results          | 21 | Present results of each meta-analysis done, including confidence intervals and measures of consistency.                                                                                                  | 7                  |
| Risk of bias across studies   | 22 | Present results of any assessment of risk of bias across studies (see Item 15).                                                                                                                          | 7                  |
| Additional analysis           | 23 | Give results of additional analyses, if done (e.g., sensitivity or subgroup analyses, meta-regression [see Item 16]).                                                                                    | 7                  |
| <b>DISCUSSION</b>             |    |                                                                                                                                                                                                          |                    |
| Summary of evidence           | 24 | Summarize the main findings including the strength of evidence for each main outcome; consider their relevance to key groups (e.g., healthcare providers, users, and policy makers).                     | 8                  |
| Limitations                   | 25 | Discuss limitations at study and outcome level (e.g., risk of bias), and at review-level (e.g., incomplete retrieval of identified research, reporting bias).                                            | 8-9                |
| Conclusions                   | 26 | Provide a general interpretation of the results in the context of other evidence, and implications for future research.                                                                                  | 8-9                |
| <b>FUNDING</b>                |    |                                                                                                                                                                                                          |                    |
| Funding                       | 27 | Describe sources of funding for the systematic review and other support (e.g., supply of data); role of funders for the systematic review.                                                               | 18                 |

From: Moher D, Liberati A, Tetzlaff J, Altman DG, The PRISMA Group (2009). Preferred Reporting Items for Systematic Reviews and Meta-Analyses: The PRISMA Statement. PLoS Med 6(7): e1000097. doi:10.1371/journal.pmed1000097

For more information, visit: [www.prisma-statement.org](http://www.prisma-statement.org).

Page 2 of 2

For peer review only - <http://bmjopen.bmj.com/site/about/guidelines.xhtml>

# BMJ Open

## Dental caries and preterm birth: A systematic review and meta-analysis

|                                 |                                                                                                                                                                                                                                                                                                                                                                                                                                                                                                                                                                                                                                                                                                                                                                                                                                                                                                   |
|---------------------------------|---------------------------------------------------------------------------------------------------------------------------------------------------------------------------------------------------------------------------------------------------------------------------------------------------------------------------------------------------------------------------------------------------------------------------------------------------------------------------------------------------------------------------------------------------------------------------------------------------------------------------------------------------------------------------------------------------------------------------------------------------------------------------------------------------------------------------------------------------------------------------------------------------|
| Journal:                        | <i>BMJ Open</i>                                                                                                                                                                                                                                                                                                                                                                                                                                                                                                                                                                                                                                                                                                                                                                                                                                                                                   |
| Manuscript ID                   | bmjopen-2017-018556.R1                                                                                                                                                                                                                                                                                                                                                                                                                                                                                                                                                                                                                                                                                                                                                                                                                                                                            |
| Article Type:                   | Research                                                                                                                                                                                                                                                                                                                                                                                                                                                                                                                                                                                                                                                                                                                                                                                                                                                                                          |
| Date Submitted by the Author:   | 24-Nov-2017                                                                                                                                                                                                                                                                                                                                                                                                                                                                                                                                                                                                                                                                                                                                                                                                                                                                                       |
| Complete List of Authors:       | Wagle, Madhu; Universitetet i Tromso Helsevitenskapelige fakultet Helsefak, Department of Clinical Medicine<br>D'Antonio, Francesco; Universitetet i Tromso Helsevitenskapelige fakultet Helsefak, Department of Clinical Medicine<br>Reierth, Eirik; University of Tromso, Science and Health Library<br>Basnet, Purusotam; Universitetet i Tromso Helsevitenskapelige fakultet Helsefak, Department of Clinical Medicine<br>Trovik, Tordis; Universitetet i Tromso Helsevitenskapelige fakultet Helsefak, Department of Community Medicine<br>Orsini, Giovanna; Universita Politecnica delle Marche, Department of Clinical Sciences and Stomatology<br>Manzoli, Lamberto; University of Ferrara, Department of Medical Sciences<br>Acharya, G; Karolinska Institutet, Center for Fetal Medicine; Universitetet i Tromso Helsevitenskapelige fakultet Helsefak, Department of Clinical Medicine |
| <b>Primary Subject Heading</b>: | Dentistry and oral medicine                                                                                                                                                                                                                                                                                                                                                                                                                                                                                                                                                                                                                                                                                                                                                                                                                                                                       |
| Secondary Subject Heading:      | Obstetrics and gynaecology                                                                                                                                                                                                                                                                                                                                                                                                                                                                                                                                                                                                                                                                                                                                                                                                                                                                        |
| Keywords:                       | Dental caries, pregnancy, pregnant woman, risk, preterm birth, EPIDEMIOLOGY, PUBLIC HEALTH                                                                                                                                                                                                                                                                                                                                                                                                                                                                                                                                                                                                                                                                                                                                                                                                        |
|                                 |                                                                                                                                                                                                                                                                                                                                                                                                                                                                                                                                                                                                                                                                                                                                                                                                                                                                                                   |

SCHOLARONE™  
Manuscripts

**Title page****Dental caries and preterm birth:  
A systematic review and meta-analysis**

Madhu Wagle<sup>1,\*</sup>, Francesco D'Antonio<sup>1,2</sup>, Eirik Reierth<sup>3</sup>, Purusotam Basnet<sup>1,2</sup>, Tordis A Trovik<sup>4</sup>,  
Giovanna Orsini<sup>5</sup>, Lamberto Manzoli<sup>6</sup>, Ganesh Acharya<sup>1,7,8</sup>

<sup>1</sup>Women's Health and Perinatology Research Group, Department of Clinical Medicine, Faculty of Health Sciences, UiT - The Arctic University of Norway, Tromsø, Norway.

<sup>2</sup>Department of Obstetrics and Gynaecology, University Hospital of Northern Norway, Tromsø, Norway.

<sup>3</sup>Science and Health Library, University Library, UiT The Arctic University of Norway, Tromsø, Norway.

<sup>4</sup>Department of Community Medicine, Faculty of Health Sciences, UiT – The Arctic University of Norway, Tromsø, Norway.

<sup>5</sup>Department of Clinical Sciences and Stomatology, Polytechnic University of Marche, Ancona, Italy.

<sup>6</sup>Department of Medical Sciences, University of Ferrara, Italy.

<sup>7</sup>Department of Clinical Science, Intervention and Technology, Karolinska Institute, Stockholm, Sweden.

<sup>8</sup>Center for Fetal Medicine, Karolinska University Hospital, Stockholm Sweden.

**\*Corresponding author – Madhu Wagle**

Women's Health and Perinatology Research Group, Department of Clinical Medicine,  
Faculty of Health Sciences,  
UiT The Arctic University of Norway,  
N – 9037, Tromsø, Norway.  
E-mail- [madhu.wagle@uit.no](mailto:madhu.wagle@uit.no)

Word Count: Abstract- 220 words, Texts- 2431 words ,

Tables- 3

Figures- 3

Supplementary files- 3

## ABSTRACT

**Objectives:** The primary objective of this systematic review was to evaluate the association between dental caries and preterm birth (PTB). The secondary objective was ascertaining the difference between women with dental caries who experienced PTB compared to those who did not with regards to decayed, missing, and filled teeth (DMFT) and decayed, missing, and filled surfaces (DMFS) indices.

**Methods:** Medline, Embase, Cinahl and Cochrane databases were searched initially in November 2015 and repeated in December 2016. We included observational cohort and case-control studies. Only studies reporting the risk of PTB in women affected compared to those not affected by dental caries in pregnancy were included. Random-effect meta-analyses were used to compute the summary odds ratio of PTB among women with caries versus women without caries, and the mean difference in either DMFT or DMFS indices between women experiencing PTB compared to those without PTB.

**Results:** Nine observational studies (4826 pregnancies) were included. Women affected by dental caries during pregnancy did not show a significantly higher risk of PTB [OR: 1.16, 95%CI (0.90, 1.49),  $p=0.25$ ,  $I^2=35\%$ ]. Also, the women with PTB did not show significantly higher DMFT or DMFS indices (summary mean differences: 1.56,  $p=0.10$ ;  $I^2=92\%$  and -0.15,  $p=0.9$ ,  $I^2=89\%$ , respectively).

**Conclusion:** Dental caries does not appear to be a substantial risk factor for PTB.

**PROSPERO Registration number:** CRD42017062573

### Strengths and limitations of this study

- Strength of the study is its robust methodology. We tried to cover all available studies, access data quality and synthesize suitable data.
- Small number of cases in some of the included studies, their design, different follow-up periods and dissimilarity of the population studies are the limitations.
- Similarly, the lack of description or classification of dental caries stage is another limitation due to which the stratification of analysis according to the disease severity could not be performed.

1  
2  
3  
4  
5  
6  
7  
8  
9  
10  
11  
12  
13  
14  
15  
16  
17  
18  
19  
20  
21  
22  
23  
24  
25  
26  
27  
28  
29  
30  
31  
32  
33  
34  
35  
36  
37  
38  
39  
40  
41  
42  
43  
44  
45  
46  
47  
48  
49  
50  
51  
52  
53  
54  
55  
56  
57  
58  
59  
60

**Keywords:** Dental caries, pregnancy, pregnant woman, risk, preterm birth.

For peer review only

## INTRODUCTION

Preterm birth (PTB) is the major cause of perinatal mortality and morbidity in the developed countries, with an estimated incidence of 5-13%<sup>1-4</sup>. Although advances in neonatal care have led to a reduction in the neonatal mortality rate, infants born prematurely remain at risk of developing a wide array of short and long-term complications such as respiratory, gastrointestinal and neurodevelopmental disabilities<sup>4</sup>.

Several risk factors have been associated with PTB<sup>1,5</sup>; among these, intrauterine infection has emerged as one of the most important factors. Despite this, PTB cannot be considered a unique disease but rather a syndrome characterized by multiple etiology and in which different factors may play a peculiar role<sup>5</sup>.

Periodontal disease has been shown to carry an increased risk for PTB; the rationale for this association is based on the suggestion that periodontitis may lead to maternal and fetal inflammation, thus triggering the common pathway of preterm parturition syndrome including increased uterine contractility, cervical ripening and decidua/membrane activation<sup>6-11</sup>. Although dental caries, defined as a localized destruction of the tooth and its structure by the acidic by-product produced by the bacteria during the dietary carbohydrate fermentation<sup>12</sup>, is one of the major oral health problems in developed countries, the effect of dental caries on pregnancy outcome have not been consistently explored. Pregnant women are more susceptible to dental caries and gingivitis compared to their non-pregnant counterparts<sup>13</sup> because of the change in their diet, frequent snacking due to food craving and oral health negligence<sup>14</sup>. If left untreated, dental caries may result in further inflammatory complications<sup>15</sup>, which could influence pregnancy outcomes. Several studies reported that dental caries causing bacteria may have some influence on the pregnancy outcome as PTB and/or low birth weight, while in contrary, the other showed no association between these two factors<sup>16-27</sup>.

The primary aim of this systematic review was to explore the association between dental caries and PTB; the secondary aim was to ascertain the differences in dental caries characteristics between women who deliver preterm compared to those who do not deliver preterm.

## METHODOLOGY

### *Protocol, eligibility criteria, information sources and search*

This review was performed according to an a-priori designed protocol and recommended for systematic reviews and meta-analysis<sup>28,29</sup>.

We developed a search strategy, and a systematic literature search was performed in the following databases: Ovid MEDLINE(R) (In-Process & Other Non-Indexed Citations, Ovid MEDLINE(R), Daily, Ovid MEDLINE(R) and Ovid OLDMEDLINE(R), Embase Classic+ (Ovid), The Web of Science® (Thomson Reuters) and The Cochrane Library (Wiley) and CINAHL Plus (EBSCOhost).

The full search was performed in November 2015 and repeated in December 2016. Supplementary material 1 shows the complete search string as it was performed in Medline. The controlled vocabulary of Medical Subject Headings (MeSH) from Medline, and the Emtree thesaurus from Embase, including sub-headings, were used when applicable. In addition, the search fields; title, abstract and key words, were searched when applicable. In The Web of Science, the search fields, title and topic were used. All references were exported to Endnote™ (x7.4 – Thomson Reuters), where duplicates were removed. There were no restrictions regarding languages or publication year for the searches.

Reference lists of relevant articles and reviews were hand searched for additional reports. MOOSE guidelines were followed<sup>30</sup>.

The study was registered with the PROSPERO database (Registration number: CRD42017062573).

### *Study selection, data collection and data items*

We aimed to compare the incidence of preterm birth among the pregnant women population with dental caries to those who do not have dental caries.

The primary outcome was the occurrence of PTB, defined as birth <37 weeks of gestation. We aimed to categorise the analysis according the type of PTB (spontaneous vs iatrogenic vs term) and according to gestational age at birth (moderate to late preterm (32 to <37 weeks), very preterm (28 to <32 weeks) and extremely preterm <28 weeks<sup>31</sup>.



1  
2  
3 The secondary objective was to ascertain the difference between women with dental caries who  
4 experienced PTB compared to those who did not experience PTB in either decayed, missing, and  
5 filled teeth (DMFT) or decayed, missing, and filled surfaces (DMFS) indices<sup>32</sup>.

6  
7  
8 DMFT and DMFS indices are numerical expression of the caries prevalence of an individual or  
9 groups and is widely used in epidemiological surveys of oral health. DMFT/DMFS is calculated  
10 by adding up permanent teeth that are caries affected wherein D is for decay, M is missing due to  
11 caries and F is filled teeth (T) or surfaces (S). If one tooth has filling as well as caries lesion, then  
12 it is counted as D for DMFT index whereas filling+caries surface is counted as D but if there is F  
13 on one and D in other surface, then they are counted differently for DMFS index. The anterior  
14 teeth up to canine have 4 and pre-molars and molars teeth have 5 surfaces, respectively in DMFS  
15 index. D+M+F = caries prevalence of an individual [maximum of 28 for DMFT and 128 for  
16 DMFS, if 28 permanent teeth are included (excluding 4 wisdom molar teeth)]<sup>32, 33</sup>.

17  
18  
19  
20  
21  
22  
23  
24  
25  
26 Studies were assessed according to the following criteria: population, outcome, gestational age at  
27 birth and clinical characteristics of the caries during pregnancy. Observational cohort and case-  
28 control studies were included. Similarly, studies reporting the occurrence of PTB in women  
29 affected compared to those not affected by dental caries in pregnancies and the full text articles  
30 were considered suitable for the inclusion in the present systematic review. Case reports,  
31 conference abstracts and case series with fewer than 3 cases were also excluded to avoid  
32 publication bias.

33  
34  
35  
36  
37 Two authors (MW, FD) reviewed all abstracts independently. Agreement regarding potential  
38 relevance was reached by consensus; full text copies of those papers were obtained and the same  
39 two reviewers independently extracted relevant data regarding study characteristics and  
40 pregnancy outcome. Inconsistencies were discussed among the reviewers and consensus reached.  
41 Any dispute was resolved by discussion with a third author. If more than one study was published  
42 for the same cohort with identical endpoints, the report containing the most comprehensive  
43 information on the population was included to avoid overlapping populations. For those articles  
44 in which information was not reported but the methodology was such that this information would  
45 have been recorded initially, the authors were contacted.

46  
47  
48  
49  
50  
51  
52  
53 Quality assessment of the included studies was performed using the Newcastle-Ottawa Scale  
54 (NOS)<sup>34</sup>; according to NOS, each study is judged on three broad perspectives: the selection of the

1  
2  
3 study groups; the comparability of the groups; and ascertainment outcome of interest. An  
4 assessment of the selection of a study includes the evaluation of the representativeness of the  
5 exposed cohort, selection of the non-exposed cohort, ascertainment of exposure and the  
6 demonstration that outcome of interest was not present at start of study. The NOS tool for the  
7 quality assessment of the studies is provided in supplementary material 2. According to the tool, a  
8 study can be awarded a maximum of one star for each numbered item within the Selection and  
9 Outcome categories. A maximum of two stars can be given for Comparability<sup>34</sup>.

### 15 ***Statistical analysis***

16  
17 A first random-effect meta-analysis of binary outcomes was used to compute the summary odds  
18 ratio (and relative 95% confidence interval - CI) of preterm birth (PTB) among women with  
19 caries versus women without caries (controls).

20  
21 Other two meta-analyses evaluated continuous outcomes: decayed, missing and filled teeth  
22 (DMFT), and decayed, missing and filled surfaces (DMFS). As the included studies did not differ  
23 in their outcome definitions, we used a random-effect approach to compute the mean difference  
24 in either DMFT or DMFS between PTB and non-PTB. In one study by Martinez-Martinez, the  
25 standard deviations were not available, and we thus conservatively used the largest values  
26 recorded in the other included studies.

27  
28 For all meta-analyses, the heterogeneity across studies was quantified using  $I^2$  statistic, and all  
29 computations were made using Review Manager (RevMan), version 5.3 (Copenhagen: The  
30 Nordic Cochrane Centre, The Cochrane Collaboration, 2014).

## RESULTS

### *General characteristics*

A total of 1786 articles were identified, 20 were assessed with respect to their eligibility for inclusion (Supplementary Material 3) and 9 studies were included in the systematic review (Table 1, Figure 1). These 9 studies included 4826 pregnancies.

Results of quality assessment of the included studies using NOS for cohort studies are presented in Table 2. Most of the included studies scored at least 1 star in each of the three categories: the selection and comparability of the study groups, and ascertainment of the outcome of interest. The main weaknesses of these studies were their retrospective design, small sample size with even smaller number of events (PTB) and different gestational ages at assessment.

### *Synthesis of the results*

Five studies explored the risk of PTB in women who had caries compared to those who did not have caries during pregnancy and reported that women affected by caries in pregnancy did not have an increased risk of delivering <37 weeks of gestation [OR: 1.16, 95% CI (0.90, 1.49),  $p=0.25$ ;  $I^2: 35\%$ ]. (Figure 2).

Stratification according to DMFT and DMFS indices to evaluate the association between caries and preterm birth was performed only by five and three studies, respectively. There was no difference in either DMFT [1.56, 95% CI (-0.28, 3.41),  $p=0.10$ ] and DMFS [-0.15, 95%CI (-3.40, 3.09),  $p=0.9$ ] (Table 3) (Figure 3).

Due to very small number of included cases and lack of information from the original study, it was not possible to perform any sub-analysis according to different gestational age at birth and type of PTB (spontaneous vs iatrogenic vs term).

## DISCUSSIONS

### *Summary of evidence*

The findings from this systematic review showed that pregnant women with dental caries are not at increased risk for PTB. Furthermore, there was no difference in the mean DMFT and DMFS indices between women with dental caries who experienced PTB compared to those who did not.

### *Strength and limitations*

This is, to our knowledge, the first systematic review exploring the strength of association between dental caries and PTB. The strength of this meta-analysis is its robust methodology. We tried to cover all available studies, assess the quality of the data and synthesize all suitable data.

The small number of cases in some of the included studies, their retrospective non-randomized design, different periods of follow-up, dissimilarity of the populations studied (due to various inclusion criteria) and lack of standardized criteria for the antenatal management of pregnancies with dental caries represent the major limitations of this systematic review. Lack of data on early PTB, which is typically associated with infection and inflammation, was another major limitation of the present systematic review. Furthermore, we could not stratify the analysis according to maternal characteristics and caries stage at diagnosis in view of the lack of such information in the large majority of included studies. Assessment of the potential publication bias was also problematic because of the nature of the outcome evaluated (outcome rates with the left-side limited to a value of zero), which limits the reliability of funnel plots, and because of the small number of individual studies, which strongly limits the reliability of formal tests. Finally, statistical heterogeneity among the included studies was another major limitation of the present review which may potentially bias the study findings. In view of these limitations, the findings from this systematic review should be interpreted with cautions.

### *Implication for clinical practice*

The consequences of overall oral health including the oral health in pregnant women is of a great concern<sup>35</sup>. Dental caries and periodontal disease are the most common oral diseases worldwide. The higher prevalence of gingival alterations during pregnancy, especially bleeding during brushing, is a problem that is commonly encountered by pregnant women. Properly maintained oral hygiene care is known to have an impact on the oral health of pregnant women<sup>36, 37</sup> and

1  
2  
3 availability of free dental care also appears to influence this<sup>38</sup>. Whereas in contrast, if proper oral  
4 hygiene is not maintained during pregnancy, the chances to develop oral health problems as  
5 enamel erosions, dental caries<sup>39</sup> and gingivitis increases.  
6  
7

8 There are no reports indicating that the incidence of dental caries increases during pregnancy, but  
9 the chances of getting dental caries could increase<sup>14</sup> and the prevalence of dental caries seemed to  
10 be higher in older pregnant women<sup>40</sup>. Despite the high dental caries prevalence in most developed  
11 countries, very few studies have explored the potential association between oral health and  
12 adverse pregnancy outcome.  
13  
14  
15  
16  
17

18 Identification of women at higher risk of PTB is fundamental to prevent the likelihood of  
19 delivering preterm. Several risk factors as been associated with PTB, such as prior history of  
20 PTB, cervical disease and infection. Despite this, finding an association between a given risk  
21 factor and the occurrence of PTB is challenging.  
22  
23  
24  
25  
26

27 Dental caries is a frequently encountered oral health problem in pregnancy as pregnant women  
28 are more susceptible to caries compared to non-pregnant women<sup>13</sup>. Being caused by an infectious  
29 process, dental caries can theoretically lead to inflammation and thus increase the risk of PTB<sup>12</sup>.  
30 Despite this, we could not find any significant association between dental caries and PTB;  
31 furthermore, we did not find any significant difference in the severity of caries assessed by  
32 DMFT and DMFS indices between women who experienced PTB compared to those who did  
33 not. In addition to this, since most of these studies have evaluated women after delivery, this may  
34 also have influenced the results.  
35  
36  
37  
38  
39  
40

41 The lack of association between dental caries and PTB is difficult to explain. The initiation and  
42 progression of the caries lesion is very slow and the destruction caused by caries in initial stage  
43 can be reversible<sup>12</sup>. In addition to this, pregnancy itself does not cause dental caries but it may  
44 exacerbate the existing condition. Dental caries is symptomless until there is severe and  
45 irreversible destruction of teeth<sup>41</sup>. It might be possible that bacterial spreading during caries  
46 formation and the subsequent production of pro-inflammatory mediators induced by oral  
47 pathogens may not be of the magnitude to cause production of pro-inflammatory mediators  
48 enough to initiate PTB.  
49  
50  
51  
52  
53  
54  
55  
56  
57  
58  
59  
60

1  
2  
3 Even though we found no significant relationship between the dental caries and PTB, it is still  
4 important for the health professionals to promote oral health among the pregnant women. This is  
5 because pregnant women are susceptible to dental problems; have very limited knowledge and  
6 awareness about the importance of oral health and its potential impact on pregnancy outcomes<sup>38,</sup>  
7  
8<sup>42</sup>. Furthermore, the risk of transmitting the oral cariogenic flora from the mother to her infant  
9 through feeding practices and predisposing the infant to early childhood caries in the future  
10 should not be neglected<sup>43-46</sup>. Therefore, large prospective studies aiming at ascertaining the  
11 association between dental caries and spontaneous PTB, according to the gestational age at  
12 occurrence, severity of the disease and presence of other co-morbidities are needed in order to  
13 elucidate the role, if any, of dental caries in increasing the risk of PTB.  
14  
15  
16  
17  
18  
19  
20  
21  
22  
23  
24  
25  
26  
27  
28  
29  
30  
31  
32  
33  
34  
35  
36  
37  
38  
39  
40  
41  
42  
43  
44  
45  
46  
47  
48  
49  
50  
51  
52  
53  
54  
55  
56  
57  
58  
59  
60

## REFERENCES

1. Goldenberg RL, Culhane JF, Iams JD, Romero R. Epidemiology and causes of preterm birth. *Lancet*. 2008;371(9606):75-84.
2. Slattery MM, Morrison JJ. Preterm delivery. *Lancet*. 2002;360(9344):1489-97.
3. McCormick MC. The contribution of low birth weight to infant mortality and childhood morbidity. *N Engl J Med*. 1985;312(2):82-90.
4. Saigal S, Doyle LW. An overview of mortality and sequelae of preterm birth from infancy to adulthood. *Lancet*. 2008;371(9608):261-9.
5. Romero R, Espinoza J, Kusanovic JP, Gotsch F, Hassan S, Erez O, et al. The preterm parturition syndrome. *BJOG*. 2006;113(Suppl 3):S17-42.
6. Jeffcoat MK, Geurs NC, Reddy MS, Goldenberg RL, Hauth JC. Current evidence regarding periodontal disease as a risk factor in preterm birth. *Ann Periodontol*. 2001;6:183-88.
7. Offenbacher S. Maternal periodontal infections, prematurity, and growth restriction. *Clin Obstet Gynecol*. 2004;47:808-21.
8. Offenbacher S, Boggess KA, Murtha AP, Jared HL, Lieff S, McKaig RG, et al. Progressive periodontal disease and risk of very preterm delivery. *Obstet Gynecol*. 2006;107(1):29-36.
9. Jarjoura K, Devine PC, Perez-Delboy A, Herrera-Abreu M, D'Alton M, Papapanou PN. Markers of periodontal infection and preterm birth. *Am J Obstet Gynecol*. 2005;192:513-19.
10. Goepfert AR, Jeffcoat MK, Andrews WW, Faye-Petersen O, Cliver SP, Goldenberg RL, et al. Periodontal disease and upper genital tract inflammation in early spontaneous preterm birth. *Obstet Gynecol*. 2004;104(4):777-83.
11. Xiong X, Buekens P, Fraser WD, Beck J, Offenbacher S. Periodontal disease and adverse pregnancy outcomes: a systematic review. *BJOG*. 2006;113:135-43.
12. Selwitz RH, Ismail AI, Pitts NB. Dental caries. *Lancet*. 2007;369(9555):51-9.
13. Martinez-Beneyto Y, Vera-Delgado MV, Perez, L, Maurandi A. Self-reported oral health and hygiene habits, dental decay, and periodontal condition among pregnant European women. *Int J Gynecol Obstet*. 2011;114(1):18-22.
14. Gajendra S, Kumar JV. Oral health and pregnancy: a review. *N Y State Dent J*. 2004;70(1):40-44.
15. Silk H, Douglass AB, Douglass JM, Silk L. Oral health during pregnancy. *Am Fam Physician*. 2008;77(8):1139-44.
16. Dasanayake AP, Li Y, Wiener H, Ruby JD, Lee MJ. Salivary *Actinomyces naeslundii* genospecies 2 and *Lactobacillus casei* level predicts pregnancy outcome. *J Periodontol*. 2005;76(2):171-77.
17. Durand R, Gunselman EL, Hodges JS, DiAngelis AS, Michalowicz BS. A pilot study of the association of cariogenic bacteria and preterm birth. *Oral Dis*. 2009;15(6):400-06.
18. Meurman JH, Furuholm J, Kaaja R, Rintamaki H, Tikkanen U. Oral health in women with pregnancy and delivery complications. *Clin Oral Investig*. 2006;10(2):96-101.



19. Mumghamba EG, Manji KP. Maternal oral health status and preterm low birth weight at Muhimbili National Hospital, Tanzania: a case-control study. *BMC Oral Health*. 2007;7:8.
20. Heimonen A, Rintamaki H, Furuholm J, Janket SJ, Kaaja R, Meurman JH. Postpartum oral health parameters in women with preterm birth. *Acta Odontol Scand*. 2008;66(6):334-41.
21. Ryalat S, Sawair F, Baqain Z, Barghout N, Amin W, Badran D, Badran E. Effect of Oral Diseases on Mothers Giving Birth to Preterm Infants. *Med Princ Pract*. 2011;20(6):556-61.
22. Vergnes JN, Kaminski M, Lelong N, Musset AM, Sixou M, Nabet C, EPIPAP Group. Maternal dental caries and pre-term birth: results from the EPIPAP study. *Acta Odontol Scand*. 2011;69(4):248-56.
23. Acharya S, Pentapati KC, Bhat PV. Dental neglect and adverse birth outcomes: a validation and observational study. *Int J Dent Hyg*. 2013;11(2):91-8.
24. Harjunmaa U, Jarnstedt J, Alho L, Dewey KG, Cheung YB, Deitchler M, Ashorn U, Maleta K, Klein NJ, Ashorn P. Association between maternal dental periapical infections and pregnancy outcomes: results from a cross-sectional study in Malawi. 2015;20(11): 1549-58.
25. Saraiva MCP, Bettiol H, Barbieri MA, Silva AA. Are intrauterine growth restriction and preterm birth associated with dental caries? *Community Dent Oral Epidemiol*. 2007;35(5):364-76.
26. Abati S, Villa A, Cetin I, Dessole S, Luglie PF, Strohmenger L, Ottolenghi L, Campus GG. Lack of association between maternal periodontal status and adverse pregnancy outcomes: a multicentric epidemiologic study. *J Matern Fetal Neonatal Med*. 2013;26(4):369-72.
27. Buduneli N, Baylas H, Buduneli E, Turkoglu O, Kose T, Dahlen G. Periodontal infections and pre-term low birth weight: a case control study. *J Clin Periodontol*. 2005;32(2): 174-81.
28. Henderson LK, Craig JC, Willis NS, Tovey D, Webster AC. How to write a Cochrane systematic review. *Nephrology (Carlton)* 2010;15(6):617-24.
29. NHS Centre for Reviews and Dissemination. Systematic reviews: CRD's guidance for undertaking reviews in health care. University of York: York (UK). 2009.
30. Stroup DF, Berlin JA, Morton SC, Olkin I, Williamson GD, Rennie D, Moher D, Becker BJ, Sipe TA, Thacker SB. Meta-analysis of observational studies in epidemiology: a proposal for reporting. Meta-analysis Of Observational Studies in Epidemiology (MOOSE) group. *JAMA*. 2000;283(15):2008-12.
31. World Health Organization. Preterm birth. 2017 [online] Available at <http://www.who.int/mediacentre/factsheets/fs363/en/> [Accessed 3 May 2017].
32. World Health Organization. Oral health surveys: basic methods. 4<sup>th</sup> ed. 1997 Geneva.
33. Malmo University. Caries prevalence and Calculation. 2010 [online] Available at <https://www.mah.se/CAPP/Methods-and-Indices/for-Caries-prevalence/> [Accessed 11 April 2017]
34. Wells GA, Shea B, O'Connell D, Peterson J, Welch V, Losos M, Tugwell P. [Newcastle-Ottawa Scale (NOS) for assessing the quality of nonrandomized studies in meta-analyses. The Ottawa Hospital Research Institute. Available at: [http://www.ohri.ca/programs/clinical\\_epidemiology/oxford.asp](http://www.ohri.ca/programs/clinical_epidemiology/oxford.asp) [Accessed 3 May 2017]



- 1
- 2
- 3 35. Ahtari MD, Georgakopoulou EA, Afentoulide N. Dental care throughout pregnancy:  
4 what a dentists must know. *Oral Health Dent Manag.* 2012;11(4):169-76.
- 5 36. Huebner CE, Milgrom P, Conrad, D. et al. Providing dental care to pregnant patients: a  
6 survey of Oregon general dentists. *J Am Dent Assoc.* 2009;140(2):211-22.
- 7 37. Boggess KA, Urlaub DM, Massey KE, Moos MK, Matheson MB, Lorenz C. Oral hygiene  
8 practice and dental service utilization among pregnant women. *J Am Dent Assoc.*  
9 2010;141(5): 553-61.
- 10 38. Hulla E, Turok Y, Nauta M, Yoong W. Self-reported oral hygiene habits, dental  
11 attendance and attitudes to dentistry during pregnancy in a sample of immigrant women in  
12 North London. *Arch Gynecol Obstet.* 2008;277(5):405-09.
- 13 39. Merglova V, Hecova H, Stehlikova J, Chaloupka P (2012) Oral health status of women  
14 with high-risk pregnancies. *Biomed Pap Med Fac Univ Palacky Olomouc Czech Repub.*  
15 2012; 156(4):337-41.
- 16 40. Shamsi M, Hidarnia A, Niknami S, Khorsandi M. The status of dental caries and some  
17 acting factors in a sample of Iranian women with pregnancy. *World J Med Sci.*  
18 2013;9(4):190-97.
- 19 41. Kloetzel MK, Huebner CE, Milgrom P. Referrals for dental care during pregnancy. *J*  
20 *Midwifery Womens Health.* 2011;56(2):110-17.
- 21 42. Keirse MJ, Plutzer K. Women's attitudes to and perceptions of oral health and dental care  
22 during pregnancy. *J Perinat Med.* 2010;38(1):3-8.
- 23 43. Zanata RL, Navarro MF, Pereira JC, Franco EB, Lauris JR, Barbosa SH. Effect of caries  
24 preventive measures directed to expectant mothers on caries experience in their children.  
25 *Braz Dent J.* 2003;14(2):75-81.
- 26 44. Goldie MP. Oral health care for pregnant and postpartum women. *Int J Dent Hyg.*  
27 2003;1(3):174-6.
- 28 45. Boggess KA, Edelstein BL. Oral health in women during preconception and pregnancy:  
29 implications for birth outcomes and infant oral health. *Matern Child Health J.* 2006;10 (5  
30 Suppl):S169-74.
- 31 46. Boggess KA, Society for Maternal-Fetal Medicine Publications Committee. Maternal oral  
32 health in pregnancy. *Obstet Gynecol.* 2008;111(4):976-86.
- 33
- 34
- 35
- 36
- 37
- 38
- 39
- 40
- 41
- 42
- 43
- 44
- 45
- 46
- 47
- 48
- 49
- 50
- 51
- 52
- 53
- 54
- 55
- 56
- 57
- 58
- 59
- 60

## TABLES

**Table 1.** General characteristics of the included studies.

| Author            | Year | Country  | Period analyzed (y) | Study design  | Gestational age at dental examination                          | Number of subject (n) | Definition of PTB |
|-------------------|------|----------|---------------------|---------------|----------------------------------------------------------------|-----------------------|-------------------|
| Martinez-Martinez | 2016 | Mexico   | 2013-2014           | Retrospective | From the first trimester of pregnancy until 8 weeks postpartum | 70                    | <37 weeks         |
| Harjunmaa         | 2015 | Malawi   | 2011-2013           | Prospective   | Within 6 weeks after delivery                                  | 1024                  | <37 weeks         |
| Acharya           | 2013 | India    | 2009                | Retrospective | Within 1 day after delivery                                    | 316                   | <37 weeks         |
| Vergnes           | 2011 | France   | 2003-2006           | Retrospective | Within 2–4 days post-partum                                    | 2201                  | <37 weeks         |
| Ryalat            | 2011 | Jordan   | 2009                | Prospective   | Within 1 week post-partum                                      | 200                   | <37 weeks         |
| Durand            | 2009 | France   | 2005-2006           | Prospective   | Within 8 weeks after delivery                                  | 107                   | <37 weeks         |
| Heimonen          | 2008 | Finland  | 2002-2004           | Retrospective | Within 2 days post-partum                                      | 328                   | <37 weeks         |
| Mumghamba         | 2007 | Tanzania | NS                  | Retrospective | Within 40 days from delivery                                   | 373                   | <37 weeks         |
| Meurman           | 2006 | Finland  | 1998-2000           | Retrospective | From the first trimester of pregnancy                          | 207                   | <37 weeks         |

- Martinez-Martinez RE, Moreno-Castillo DF, Loyola-Rodriguez JP, Sanchez-Medrano AG, Miguel-Hernandez JH, Olvera-Delgado JH, Dominguez-Perez RA. Association between periodontitis, periodontopathogens and preterm birth: is it real? *Arch Gynecol Obstet.* 2016;294(1):47-54
- Harjunmaa U, Jarnstedt J, Alho L, Dewey KG, Cheung YB, Deitchler M, Ashorn U, Maleta K, Klein NJ, Ashorn P. Association between maternal dental periapical infections and pregnancy outcomes: results from a cross-sectional study in Malawi. 2015;20(11):1549-58.
- Acharya S, Pentapati KC, Bhat PV. Dental neglect and adverse birth outcomes: a validation and observational study. *IntJ Dent Hyg.* 2013;11(2):91-8.
- Vergnes JN, Kaminski M, Lelong N, Musset AM, Sixou M, Nabet C, EPIPAP Group. Maternal dental caries and pre-term birth: results from the EPIPAP study. *Acta Odontol Scand.* 2011;69(4):248-56.
- Ryalat S, Sawair F, Baqain Z, Barghout N, Amin W, Badran D, Badran E. Effect of Oral Diseases on Mothers Giving Birth to Preterm Infants. *Med Princ Pract.* 2011;20(6):556-61.
- Durand R, Gunselman EL, Hodges JS, Diangelis AJ, Michalowicz BS. A pilot study of the association between cariogenic oral bacteria and preterm birth. *Oral Dis.* 2009;15(6):400-6.
- Heimonen A, Rintamaki H, Furuholm J, Janket SJ, Kaaja R, Meurman JH. Postpartum oral health parameters in women with preterm birth. *Acta Odontol Scand.* 2008;66(6):334-41.
- Mumghamba EG, Manji KP. Maternal oral health status and preterm low birth weight at Muhimbili National Hospital, Tanzania: a case-control study. *BMC Oral Health.* 2007;7:8
- Meurman JH, Furuholm J, Kaaja R, Rintamaki H, Tikkanen U. Oral health in women with pregnancy and delivery complications. *Clin Oral Investig.* 2006;10(2):96-101.

**Table 2.** Quality assessment of the included studies according to Newcastle-Ottawa Scale (NOS) a study can be awarded a maximum of one star for each numbered item within the Selection and Outcome categories. A maximum of two stars can be given for Comparability.

| Author            | Year | Selection | Comparability | Outcome |
|-------------------|------|-----------|---------------|---------|
| Martinez-Martinez | 2016 | ★★        | ★             | ★       |
| Harjunmaa         | 2015 | ★★        | ★             | ★       |
| Acharya           | 2013 | ★★        | ★             | ★★      |
| Vergnes           | 2011 | ★★★       | ★★            | ★       |
| Ryalat            | 2011 | ★★★       | ★             | ★★      |
| Durand            | 2009 | ★★★★      | ★★            | ★★      |
| Heimonen          | 2008 | ★★        | ★             | ★       |
| Mumghamba         | 2007 | ★★        | ★             | ★       |
| Meurman           | 2006 | ★★        | ★             | ★       |

**Table 3.** Selected outcomes evaluating the association between dental caries and preterm birth.

| <b>Outcomes</b>                                               | <b>N. studies<br/>(n/N)</b> | <b>Odds Ratio<br/>(95% CI)</b>      | <b>p</b> | <b>I<sup>2</sup>, %<sup>a</sup></b> |
|---------------------------------------------------------------|-----------------------------|-------------------------------------|----------|-------------------------------------|
| Preterm birth (PTB), women with dental caries versus controls | 5<br>(1472/4246)            | 1.16 (0.90; 1.49)                   | 0.25     | 35                                  |
|                                                               |                             |                                     |          |                                     |
|                                                               | <b>N. studies<br/>(n/N)</b> | <b>Mean difference<br/>(95% CI)</b> | <b>p</b> | <b>I<sup>2</sup>, %</b>             |
|                                                               |                             |                                     |          |                                     |
| DMFT (PTB versus Non-PTB)                                     | 5 (2963)                    | 1.56 (-0.28; 3.41)                  | 0.10     | 92                                  |
|                                                               |                             |                                     |          |                                     |
| DMFS (PTB versus Non-PTB)                                     | 3 (2594)                    | -0.15 (-3.40; 3.09)                 | 0.9      | 89                                  |
|                                                               |                             |                                     |          |                                     |

CI: Confidence interval. n: number of events. N: total number of participants. DMFT: Decayed, missed, and filled teeth. DMFS: Decayed, missed, and filled surface.

a: I<sup>2</sup> is a measure of the heterogeneity among the included studies. a value  $\geq 50\%$  indicates high while  $< 50\%$  low heterogeneity.

## FUNDING

No funding was received for the conduction of this review.

The publication charges for this article have been funded by a grant from the publication fund of UiT The Arctic University of Norway.

## CONTRIBUTORS

Study concept, design and methodology - MW, GA, FD'A, ER

Data Collection and entry - ER

Abstracts and articles review - MW, FD'A

Analysis and interpretation of data - F'DA, MW, GO, LM

Supervision - FD'A, GA, PB, TAT

Writing, review, critique, comments and revision of manuscript- MW, FD'A, ER, TAT, PB, GO, LM, GA

## ACKNOWLEDGEMENT

We would sincerely like to thank Prof. S Acharya, Prof. S Abati, Prof. I Cetin, Prof. GG Campus, Prof. A Villa, Prof. R Martinez, Prof. S Ryalat, Prof. JH Meurman, Prof. Y Khader, Prof. A Heimonen, Prof. U Harjunmaa, Prof. R Durand, Prof. N Buduneli and Prof. AP Dasanayake for their co-operation and contribution by providing additional data and necessary information for this systemic review.

## COMPETING INTERESTS

The authors declare that they have no competing interests.

## DATA SHARING STATEMENT

No additional data is available.

## ABBREVIATION

CI – Confidence Interval

DMFS – Decayed, Missing, Filled Surface

DMFT- Decayed, Missing, Filled Teeth

NOS - Newcastle-Ottawa Scale

OR – Odds Ratio

PTB – Preterm Birth

## FIGURES

**Figure\_1.** Systematic review flowchart

**Figure\_2.** Pooled odd ratio (OR) for the risk of preterm birth (PTB) in women compared with those without dental caries.

**Figure\_3\_a\_b.** Mean differences in DMFT and DMFS indices in women with dental caries compared to those who did not experience PTB.

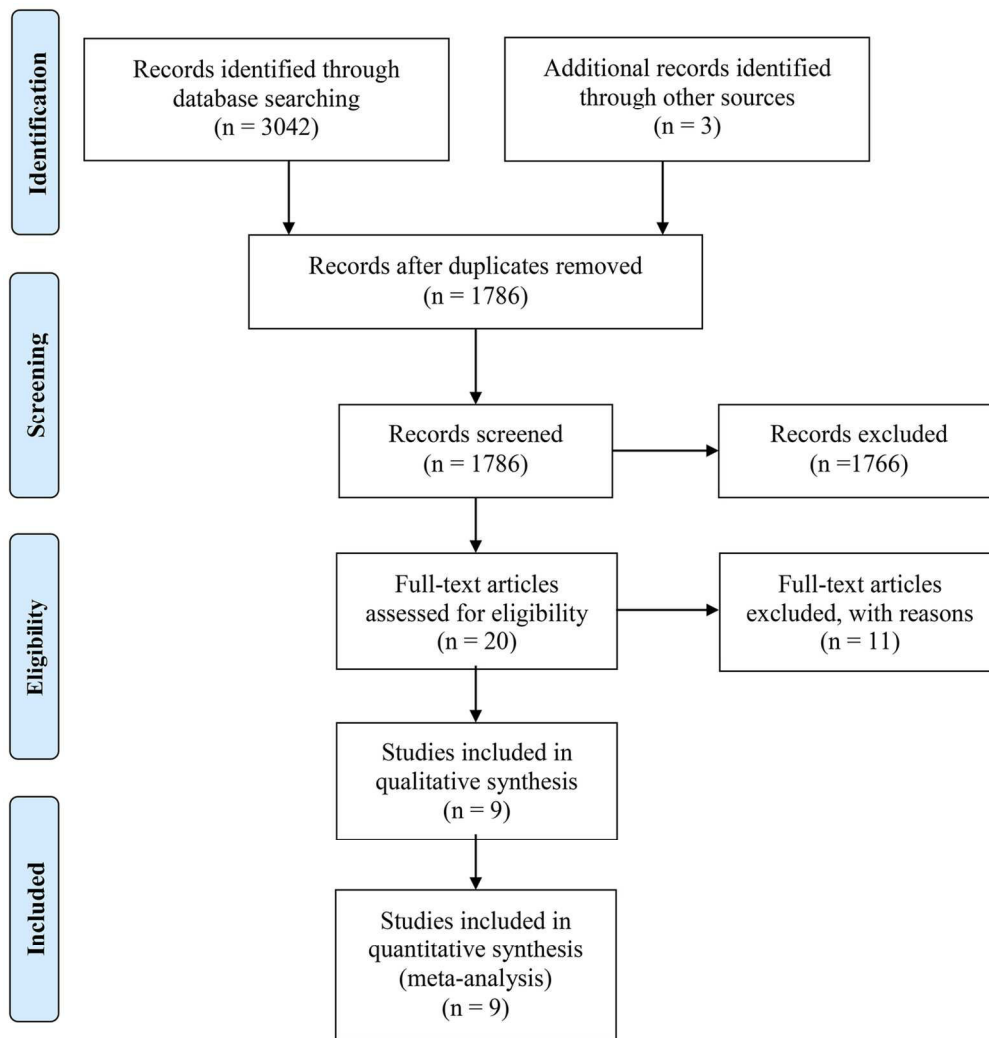

Figure\_1. Systematic review flowchart

130x136mm (300 x 300 DPI)

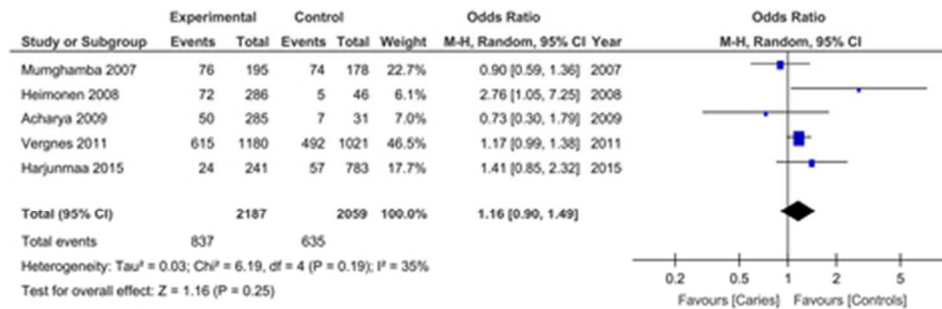

Figure\_2. Pooled odd ratio (OR) for the risk of preterm birth (PTB) in women compared with those without dental caries.

40x12mm (300 x 300 DPI)



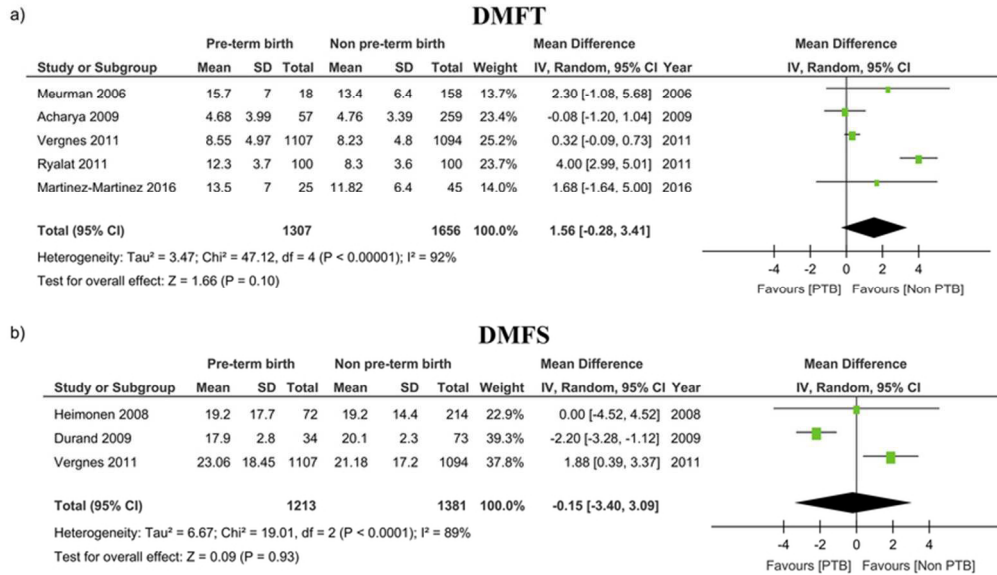

Figure\_3\_a\_b. Mean differences in DMFT and DMFS indices in women with dental caries compared to those who did not experience PTB.

72x41mm (300 x 300 DPI)

## Supplementary material 1

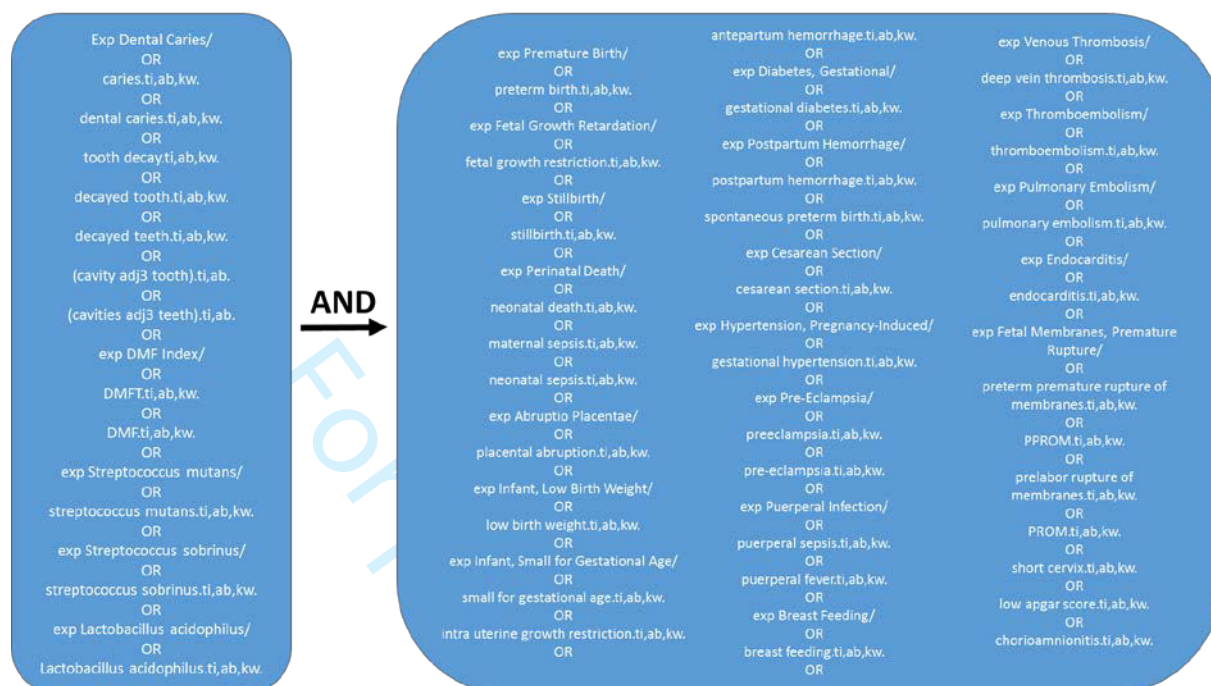

## NEWCASTLE - OTTAWA QUALITY ASSESSMENT SCALE CASE CONTROL STUDIES

Note: A study can be awarded a maximum of one star for each numbered item within the Selection and Exposure categories. A maximum of two stars can be given for Comparability.

### Selection

- 1) Is the case definition adequate?
  - a) yes, with independent validation \*
  - b) yes, eg record linkage or based on self reports
  - c) no description
- 2) Representativeness of the cases
  - a) consecutive or obviously representative series of cases \*
  - b) potential for selection biases or not stated
- 3) Selection of Controls
  - a) community controls \*
  - b) hospital controls
  - c) no description
- 4) Definition of Controls
  - a) no history of disease (endpoint) \*
  - b) no description of source

### Comparability

- 1) Comparability of cases and controls on the basis of the design or analysis
  - a) study controls for \_\_\_\_\_ (Select the most important factor.) \*
  - b) study controls for any additional factor \* (This criteria could be modified to indicate specific control for a second important factor.)

### Exposure

- 1) Ascertainment of exposure
  - a) secure record (eg surgical records) \*
  - b) structured interview where blind to case/control status \*
  - c) interview not blinded to case/control status
  - d) written self report or medical record only
  - e) no description
- 2) Same method of ascertainment for cases and controls
  - a) yes \*
  - b) no
- 3) Non-Response rate
  - a) same rate for both groups \*
  - b) non respondents described
  - c) rate different and no designation

## NEWCASTLE - OTTAWA QUALITY ASSESSMENT SCALE COHORT STUDIES

Note: A study can be awarded a maximum of one star for each numbered item within the Selection and Outcome categories. A maximum of two stars can be given for Comparability

### Selection

#### 1) Representativeness of the exposed cohort

- a) truly representative of the average \_\_\_\_\_ (describe) in the community \*
- b) somewhat representative of the average \_\_\_\_\_ in the community \*
- c) selected group of users eg nurses, volunteers
- d) no description of the derivation of the cohort

#### 2) Selection of the non exposed cohort

- a) drawn from the same community as the exposed cohort \*
- b) drawn from a different source
- c) no description of the derivation of the non exposed cohort

#### 3) Ascertainment of exposure

- a) secure record (eg surgical records) \*
- b) structured interview \*
- c) written self report
- d) no description

#### 4) Demonstration that outcome of interest was not present at start of study

- a) yes \*
- b) no

### Comparability

#### 1) Comparability of cohorts on the basis of the design or analysis

- a) study controls for \_\_\_\_\_ (select the most important factor) \*
- b) study controls for any additional factor \* (This criteria could be modified to indicate specific control for a second important factor.)

### Outcome

#### 1) Assessment of outcome

- a) independent blind assessment \*
- b) record linkage \*
- c) self report
- d) no description

#### 2) Was follow-up long enough for outcomes to occur

- a) yes (select an adequate follow up period for outcome of interest) \*
- b) no

#### 3) Adequacy of follow up of cohorts

- a) complete follow up - all subjects accounted for \*
- b) subjects lost to follow up unlikely to introduce bias - small number lost - > \_\_\_\_ % (select an adequate %) follow up, or description provided of those lost) \*
- c) follow up rate < \_\_\_\_ % (select an adequate %) and no description of those lost
- d) no statement

**Supplementary Table 3.** Excluded studies and reason for the exclusion.

| Author     | Year | Title                                                                                                                      | Reason for the exclusion                                                                                                                                                                                                                                                            |
|------------|------|----------------------------------------------------------------------------------------------------------------------------|-------------------------------------------------------------------------------------------------------------------------------------------------------------------------------------------------------------------------------------------------------------------------------------|
| Buduneli   | 2005 | Periodontal infections and pre-term low birth weight: a case-control study                                                 | The number of decayed teeth were provided as a continuous variable; thus it was not possible to extrapolate any data regarding the occurrence of PTB in women with compared to those without caries. Furthermore, no information on the DMFT score was provided by the authors.     |
| Dasanayake | 2005 | Salivary Actinomyces naeslundii Genospecies 2 and Lactobacillus casei Levels Predict Pregnancy Outcomes                    | No data on the outcomes explored in this systematic review                                                                                                                                                                                                                          |
| Shulman    | 2005 | Is There an Association between Low Birth Weight and Caries in the Primary Dentition?                                      | No data on caries in pregnancy                                                                                                                                                                                                                                                      |
| Bosnjak    | 2006 | Pre-term delivery and periodontal disease: a case-control study from Croatia                                               | No data on the outcomes explored in this systematic review                                                                                                                                                                                                                          |
| Khader     | 2007 | Risk Indicators of Pre-Eclampsia in North Jordan: Is Dental Caries Involved?                                               | No data on caries and PTB                                                                                                                                                                                                                                                           |
| Saraiva    | 2007 | Are intrauterine growth restriction and preterm birth associated with dental caries?                                       | No data on caries in pregnancy                                                                                                                                                                                                                                                      |
| Cunha-Cruz | 2009 | Intrauterine Growth Restriction and Preterm Birth Were not Associated with Primary Teeth Caries                            | No data on caries in pregnancy                                                                                                                                                                                                                                                      |
| Durand     | 2009 | A pilot study of the association between cariogenic oral bacteria and preterm birth                                        | It was not possible to extrapolate data regarding the occurrence of PTB in pregnancies with compared to those without caries; furthermore, it was not possible to extract any information regarding the mean DMFT values in women who compared to those who did not deliver preterm |
| Merglova   | 2012 | Oral health status of women with high-risk pregnancies                                                                     | No data on the outcomes explored in this systematic review                                                                                                                                                                                                                          |
| Abati      | 2013 | Lack of association between maternal periodontal status and adverse pregnancy outcomes: a multicentric epidemiologic study | It was not possible to extrapolate data regarding the occurrence of PTB in pregnancies with compared to those without caries; furthermore, it was not possible to extract any information regarding the mean DMFT values in women who compared to those who did                     |
| Sayyed     | 2014 | The relationship between term pre-eclampsia and the risk of early childhood caries                                         | No data on caries in pregnancy                                                                                                                                                                                                                                                      |

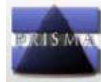

# PRISMA 2009 Checklist

| Section/topic                      | #  | Checklist item                                                                                                                                                                                                                                                                                              | Reported on page # |
|------------------------------------|----|-------------------------------------------------------------------------------------------------------------------------------------------------------------------------------------------------------------------------------------------------------------------------------------------------------------|--------------------|
| <b>TITLE</b>                       |    |                                                                                                                                                                                                                                                                                                             |                    |
| Title                              | 1  | Identify the report as a systematic review, meta-analysis, or both.                                                                                                                                                                                                                                         | 1                  |
| <b>ABSTRACT</b>                    |    |                                                                                                                                                                                                                                                                                                             |                    |
| Structured summary                 | 2  | Provide a structured summary including, as applicable: background; objectives; data sources; study eligibility criteria, participants, and interventions; study appraisal and synthesis methods; results; limitations; conclusions and implications of key findings; systematic review registration number. | 2                  |
| <b>INTRODUCTION</b>                |    |                                                                                                                                                                                                                                                                                                             |                    |
| Rationale                          | 3  | Describe the rationale for the review in the context of what is already known.                                                                                                                                                                                                                              | 4                  |
| Objectives                         | 4  | Provide an explicit statement of questions being addressed with reference to participants, interventions, comparisons, outcomes, and study design (PICOS).                                                                                                                                                  | 5                  |
| <b>METHODS</b>                     |    |                                                                                                                                                                                                                                                                                                             |                    |
| Protocol and registration          | 5  | Indicate if a review protocol exists, if and where it can be accessed (e.g., Web address), and, if available, provide registration information including registration number.                                                                                                                               | 5                  |
| Eligibility criteria               | 6  | Specify study characteristics (e.g., PICOS, length of follow-up) and report characteristics (e.g., years considered, language, publication status) used as criteria for eligibility, giving rationale.                                                                                                      | 5                  |
| Information sources                | 7  | Describe all information sources (e.g., databases with dates of coverage, contact with study authors to identify additional studies) in the search and date last searched.                                                                                                                                  | 5                  |
| Search                             | 8  | Present full electronic search strategy for at least one database, including any limits used, such that it could be repeated.                                                                                                                                                                               | 5                  |
| Study selection                    | 9  | State the process for selecting studies (i.e., screening, eligibility, included in systematic review, and, if applicable, included in the meta-analysis).                                                                                                                                                   | 5-6                |
| Data collection process            | 10 | Describe method of data extraction from reports (e.g., piloted forms, independently, in duplicate) and any processes for obtaining and confirming data from investigators.                                                                                                                                  | 5-6                |
| Data items                         | 11 | List and define all variables for which data were sought (e.g., PICOS, funding sources) and any assumptions and simplifications made.                                                                                                                                                                       | 5-6                |
| Risk of bias in individual studies | 12 | Describe methods used for assessing risk of bias of individual studies (including specification of whether this was done at the study or outcome level), and how this information is to be used in any data synthesis.                                                                                      | 6-7                |
| Summary measures                   | 13 | State the principal summary measures (e.g., risk ratio, difference in means).                                                                                                                                                                                                                               | 6-7                |
| Synthesis of results               | 14 | Describe the methods of handling data and combining results of studies, if done, including measures of consistency (e.g., $I^2$ ) for each meta-analysis.                                                                                                                                                   | 7-8                |

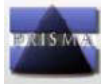

# PRISMA 2009 Checklist

| Section/topic                 | #  | Checklist item                                                                                                                                                                                           | Reported on page # |
|-------------------------------|----|----------------------------------------------------------------------------------------------------------------------------------------------------------------------------------------------------------|--------------------|
| Risk of bias across studies   | 15 | Specify any assessment of risk of bias that may affect the cumulative evidence (e.g., publication bias, selective reporting within studies).                                                             | 7-8                |
| Additional analyses           | 16 | Describe methods of additional analyses (e.g., sensitivity or subgroup analyses, meta-regression), if done, indicating which were pre-specified.                                                         | 7-8                |
| <b>RESULTS</b>                |    |                                                                                                                                                                                                          |                    |
| Study selection               | 17 | Give numbers of studies screened, assessed for eligibility, and included in the review, with reasons for exclusions at each stage, ideally with a flow diagram.                                          | 8                  |
| Study characteristics         | 18 | For each study, present characteristics for which data were extracted (e.g., study size, PICOS, follow-up period) and provide the citations.                                                             | 8                  |
| Risk of bias within studies   | 19 | Present data on risk of bias of each study and, if available, any outcome level assessment (see item 12).                                                                                                | 8                  |
| Results of individual studies | 20 | For all outcomes considered (benefits or harms), present, for each study: (a) simple summary data for each intervention group (b) effect estimates and confidence intervals, ideally with a forest plot. | 8                  |
| Synthesis of results          | 21 | Present results of each meta-analysis done, including confidence intervals and measures of consistency.                                                                                                  | 8                  |
| Risk of bias across studies   | 22 | Present results of any assessment of risk of bias across studies (see Item 15).                                                                                                                          | 8                  |
| Additional analysis           | 23 | Give results of additional analyses, if done (e.g., sensitivity or subgroup analyses, meta-regression [see Item 16]).                                                                                    | 8                  |
| <b>DISCUSSION</b>             |    |                                                                                                                                                                                                          |                    |
| Summary of evidence           | 24 | Summarize the main findings including the strength of evidence for each main outcome; consider their relevance to key groups (e.g., healthcare providers, users, and policy makers).                     | 9                  |
| Limitations                   | 25 | Discuss limitations at study and outcome level (e.g., risk of bias), and at review-level (e.g., incomplete retrieval of identified research, reporting bias).                                            | 9-10               |
| Conclusions                   | 26 | Provide a general interpretation of the results in the context of other evidence, and implications for future research.                                                                                  | 10-11              |
| <b>FUNDING</b>                |    |                                                                                                                                                                                                          |                    |
| Funding                       | 27 | Describe sources of funding for the systematic review and other support (e.g., supply of data); role of funders for the systematic review.                                                               | 18                 |

From: Moher D, Liberati A, Tetzlaff J, Altman DG, The PRISMA Group (2009). Preferred Reporting Items for Systematic Reviews and Meta-Analyses: The PRISMA Statement. PLoS Med 6(7): e1000097. doi:10.1371/journal.pmed1000097

For more information, visit: [www.prisma-statement.org](http://www.prisma-statement.org).
