# Supplementary material for: Dental caries and preterm birth: a systematic review and meta-analysis
Source: PubMed Central journal article supplement — BMJ Open. 2018 Mar 2;8(3):e018556. doi: 10.1136/bmjopen-2017-018556 (PMC5855295; doi:10.1136/bmjopen-2017-018556), 2018-03-02
Supplement: bmjopen-2017-018556supp003.pdf [file bmjopen-2017-018556supp003.pdf]

**Supplementary Table 3.** Excluded studies and reason for the exclusion.

| <b>Author</b> | <b>Year</b> | <b>Title</b>                                                                                                               | <b>Reason for the exclusion</b>                                                                                                                                                                                                                                                     |
|---------------|-------------|----------------------------------------------------------------------------------------------------------------------------|-------------------------------------------------------------------------------------------------------------------------------------------------------------------------------------------------------------------------------------------------------------------------------------|
| Buduneli      | 2005        | Periodontal infections and pre-term low birth weight: a case-control study                                                 | The number of decayed teeth were provided as a continuous variable; thus it was not possible to extrapolate any data regarding the occurrence of PTB in women with compared to those without caries. Furthermore, no information on the DMFT score was provided by the authors.     |
| Dasanayake    | 2005        | Salivary Actinomyces naeslundii Genospecies 2 and Lactobacillus casei Levels Predict Pregnancy Outcomes                    | No data on the outcomes explored in this systematic review                                                                                                                                                                                                                          |
| Shulman       | 2005        | Is There an Association between Low Birth Weight and Caries in the Primary Dentition?                                      | No data on caries in pregnancy                                                                                                                                                                                                                                                      |
| Bosnjak       | 2006        | Pre-term delivery and periodontal disease: a case-control study from Croatia                                               | No data on the outcomes explored in this systematic review                                                                                                                                                                                                                          |
| Khader        | 2007        | Risk Indicators of Pre-Eclampsia in North Jordan: Is Dental Caries Involved?                                               | No data on caries and PTB                                                                                                                                                                                                                                                           |
| Saraiva       | 2007        | Are intrauterine growth restriction and preterm birth associated with dental caries?                                       | No data on caries in pregnancy                                                                                                                                                                                                                                                      |
| Cunha-Cruz    | 2009        | Intrauterine Growth Restriction and Preterm Birth Were not Associated with Primary Teeth Caries                            | No data on caries in pregnancy                                                                                                                                                                                                                                                      |
| Durand        | 2009        | A pilot study of the association between cariogenic oral bacteria and preterm birth                                        | It was not possible to extrapolate data regarding the occurrence of PTB in pregnancies with compared to those without caries; furthermore, it was not possible to extract any information regarding the mean DMFT values in women who compared to those who did not deliver preterm |
| Merglova      | 2012        | Oral health status of women with high-risk pregnancies                                                                     | No data on the outcomes explored in this systematic review                                                                                                                                                                                                                          |
| Abati         | 2013        | Lack of association between maternal periodontal status and adverse pregnancy outcomes: a multicentric epidemiologic study | It was not possible to extrapolate data regarding the occurrence of PTB in pregnancies with compared to those without caries; furthermore, it was not possible to extract any information regarding the mean DMFT values in women who compared to those who did                     |
| Sayyed        | 2014        | The relationship between term pre-eclampsia and the risk of early childhood caries                                         | No data on caries in pregnancy                                                                                                                                                                                                                                                      |
